# Supplementary material for: A syn outer-sphere oxidative addition: the reaction mechanism in Pd/Senphos-catalyzed carboboration of 1,3-enynes
Source: Royal Society of Chemistry journal article supplement (doi:10.1039/d2sc05828f), 2023-01-01
Supplement: d2sc05828f1.pdf [file d2sc05828f1.pdf]

## Supporting Information For

### **A Syn Outer-Sphere Oxidative Addition: The Reaction Mechanism in Pd/Senphos-Catalyzed Carboboration of 1,3-Enynes**

Ziyong Wang,<sup>a</sup> Walid Lamine,<sup>b</sup> Karinne Miqueu,<sup>\*b</sup> Shih-Yuan Liu<sup>\*a,b</sup>

<sup>a</sup>Department of Chemistry, Boston College, Chestnut Hill, Massachusetts 02467-3860, United States

<sup>b</sup>Université de Pau et des Pays de l'Adour, E2S UPPA, CNRS, IPREM UMR 5254, Hélioparc, 2 avenue P. Angot, 64053 Pau cedex 09, France

|    |                                                         |    |
|----|---------------------------------------------------------|----|
| 1. | General Information.....                                | 2  |
| 2. | <sup>31</sup> P NMR Experiments (Scheme 3).....         | 3  |
| 3. | Initial-rate Kinetic Study (Scheme 4).....              | 4  |
| 4. | Hammett Study (Scheme 5).....                           | 10 |
| 5. | Arrhenius Analysis and Eyring Analysis (Scheme 6).....  | 15 |
| 6. | BN vs CC: Ligand Performance Comparison (Scheme 7)..... | 18 |
| 7. | Computational Details (Figures 1-2).....                | 19 |
| 8. | NMR Spectra .....                                       | 29 |
| 9. | References.....                                         | 36 |

## 1. General Information

All oxygen- and moisture-sensitive manipulations were carried out under an inert atmosphere using either standard Schlenk techniques or a glove box. Unless otherwise noted, all reagents were obtained from commercial sources and used as received. Bulk volumes of diethyl ether, dichloromethane, pentane, toluene and tetrahydrofuran were passed through an alumina column and dispensed from a solvent purification system under argon.

$^1\text{H}$ ,  $^{13}\text{C}$ ,  $^{11}\text{B}$ , and  $^{19}\text{F}$  NMR spectra were measured on Varian 400, 500 or 600 MHz spectrometers or Inova 500 MHz spectrometer at the Boston College nuclear magnetic resonance facility. Data are reported as follows: chemical shift, integration, multiplicity (s = singlet, d = doublet, t = triplet, q = quartet, br = broad, m = multiplet), and coupling constant (Hz).  $^1\text{H}$  and  $^{13}\text{C}$  spectra were internally referenced to residual solvent peaks ( $^1\text{H}$   $\text{CDCl}_3$ :  $\delta = 7.26$  ppm,  $^{13}\text{C}$   $\text{CDCl}_3$ :  $\delta = 77.16$  ppm,  $^1\text{H}$  toluene- $d_8$ :  $\delta = 2.09$  ppm);  $^{11}\text{B}$  spectra were externally referenced to a standard of  $\text{BF}_3 \cdot \text{Et}_2\text{O}$  ( $\delta = 0.0$  ppm), and  $^{19}\text{F}$  spectra were referenced to of  $\alpha, \alpha, \alpha$ -trifluorotoluene ( $\delta = -63.7$  ppm). In  $^{13}\text{C}$  NMR analysis, peaks for carbon atoms adjacent to a boron center were generally not observed owing to quadrupolar broadening.

$\text{CDCl}_3$  was purchased from Cambridge Isotope Laboratories and was passed through  $\text{K}_2\text{CO}_3$  plug and then distilled over  $\text{P}_2\text{O}_5$  under  $\text{N}_2$  and stored over activated  $4\text{\AA}$  molecular sieves prior to use. Toluene- $d_8$  was purchased from Cambridge Isotope Laboratories and was distilled over  $\text{CaH}_2$  and then degassed through freeze-pump-thaw cycles. All work-up and purification procedures were carried out with reagent grade solvents (purchased from Fisher Scientific) in air unless otherwise noted.

All IR spectra were measured on a Bruker Alpha-P FT-IR equipped with a single crystal diamond ATR module, and values are reported in  $\text{cm}^{-1}$ .

High-resolution mass spectrometry (HRMS) data were generated in Boston College facilities using direct analysis in real-time (DART) on a JEOL AccuTOF DART spectrometer.

## 2. <sup>31</sup>P NMR Experiments (Scheme 3)

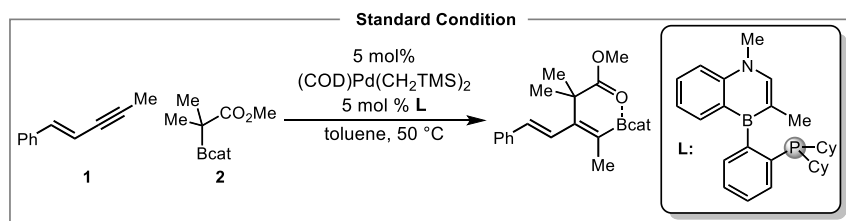

- 1) In a nitrogen-filled glovebox, an oven-dried vial (4 mL) was sequentially charged with (COD)Pd(CH<sub>2</sub>TMS)<sub>2</sub> (7.8 mg, 20 μmol), **L** (8.6 mg, 20 μmol), and toluene (500 μL). The solution was allowed to stir at room temperature for 10 min and the resulting green solution was transferred to an oven-dried J-Young tube. Then, the J-Young tube was tightly capped with the Teflon plug and taken out of the glove box. A <sup>31</sup>P NMR spectrum was acquired in the NMR spectrometer preheated at 50 °C, which was labeled as **Spectrum A**.
- 2) In a nitrogen-filled glovebox, an oven-dried vial (4 mL) was sequentially charged with (COD)Pd(CH<sub>2</sub>TMS)<sub>2</sub> (7.8 mg, 20 μmol), **L** (8.6 mg, 20 μmol), and toluene (100 μL). The solution was allowed to stir at room temperature for 10 min before adding a solution of **1** (56.9 mg, 0.40 mmol, 20.0 equiv.) in toluene (400 μL). The resulting yellow solution was allowed to stir for another 5 min before being transferred to an oven-dried J-Young tube. The J-Young tube was tightly capped with the Teflon plug, taken out of the glove box, and the <sup>31</sup>P NMR spectrum was acquired in the NMR spectrometer preheated at 50 °C, which was labeled as **Spectrum B**.
- 3) In a nitrogen-filled glovebox, an oven-dried vial (4 mL) was sequentially charged with (COD)Pd(CH<sub>2</sub>TMS)<sub>2</sub> (7.8 mg, 20 μmol), **L** (8.6 mg, 20 μmol), and toluene (100 μL). The solution was allowed to stir at room temperature for 10 min before adding a solution of **2** (176 mg, 0.800 mmol, 40.0 equiv.) in toluene (400.0 μL). The resulting yellow solution was allowed to stir for another 5 min before being transferred to an oven-dried J-Young tube. Then, the J-Young tube was tightly capped with the Teflon plug, taken out of the glove box, and the <sup>31</sup>P NMR spectrum was acquired in the NMR spectrometer preheated at 50 °C, which was labeled as **Spectrum C**.
- 4) In a nitrogen-filled glovebox, an oven-dried vial (4 mL) was sequentially charged with (COD)Pd(CH<sub>2</sub>TMS)<sub>2</sub> (7.8 mg, 20 μmol), **L** (8.6 mg, 20 μmol), and toluene (100 μL). The solution was allowed to stir at room temperature for 10 min before adding a solution of **1** (57 mg, 0.40 mmol, 20 equiv.) in toluene (100 μL). The resulting yellow solution was allowed to stir for another 5 min before adding a solution of **2** (176 mg, 0.800 mmol, 40.0 equiv.) in toluene (150 μL). The reaction mixture was transferred to an oven-dried J-Young tube, and the <sup>31</sup>P NMR spectrum was acquired in the NMR spectrometer preheated at 50 °C using a pre-acquisition delay in array mode for the length of the experiment. The spectrum of an actively running reaction is illustrated as **Spectrum D**.

### 3. Initial-rate Kinetic Study (Scheme 4)

We determined the kinetic orders in [1], [2] and [Pd/L<sub>total</sub>] via initial-rate kinetics observed by <sup>1</sup>H NMR spectroscopy analysis.

#### 3.1 Procedure for Reaction Order Determination for Enyne 1

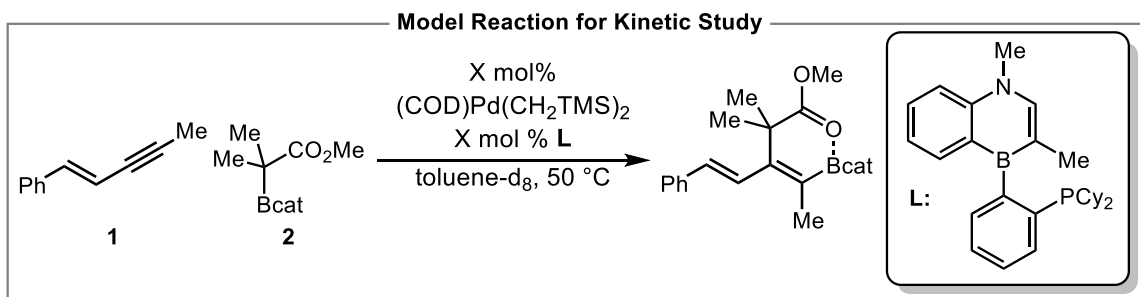

In a nitrogen-filled glovebox, (COD)Pd(CH<sub>2</sub>TMS)<sub>2</sub> (38.9 mg, 0.100 mmol), **L** (43.0 mg, 0.100 mmol) was dissolved in toluene-d<sub>8</sub> to prepare **Stock Solution A** (0.500 mL, 0.200 M). Enyne **1** (379 mg, 2.67 mmol) was dissolved in toluene-d<sub>8</sub> to prepare **Stock Solution B** (0.500 mL, 5.34 M). C-boron enolate **2** (880 mg, 4.00 mmol) was dissolved in toluene-d<sub>8</sub> to prepare **Stock Solution C** (1.00 mL, 4.00 M).

For each kinetic run, a vial was charged with **Stock Solution A** (100 μL, 0.0200 mmol Pd/L), **Stock Solution B** (trial 3: 56 μL (0.28 mmol **1**), trial 1: 75 μL (0.40 mmol **1**), trial 2: 112 μL (0.600 mmol **1**), trial 4: 150 μL (0.801 mmol **1**), respectively), and **Stock Solution C** (200 μL, 0.800 mmol **2**) sequentially. The internal standard 1,2,4,5-tetramethylbenzene (26.8 mg, 0.200 mmol) was added to the reaction vial. Additional toluene-d<sub>8</sub> (trial 3: 144 μL, trial 1: 125 μL, trial 2: 88 μL, trial 4: 50 μL, respectively) was added to the reaction vessel to maintain an overall volume of 0.500 mL. Then, the resulting homogeneous solution was quickly transferred to a J-Young tube. The J-Young tube was inserted into the preheated NMR probe (50.0 °C) and <sup>1</sup>H NMR spectra were acquired using a pre-acquisition delay in array mode for the length of the experiment. The raw data was then processed in MestReNova (peak integrations were normalized against 1,2,4,5-tetramethylbenzene as the internal standard.) and Microsoft® Excel to determine the initial rate of the reaction. The order dependence for **1** was derived as the slope of its log (initial rate) vs. log (starting concentration of **1**) plot.

Summary of reaction rates determined from disappearance of [1] over time by varying the concentration of [1]:

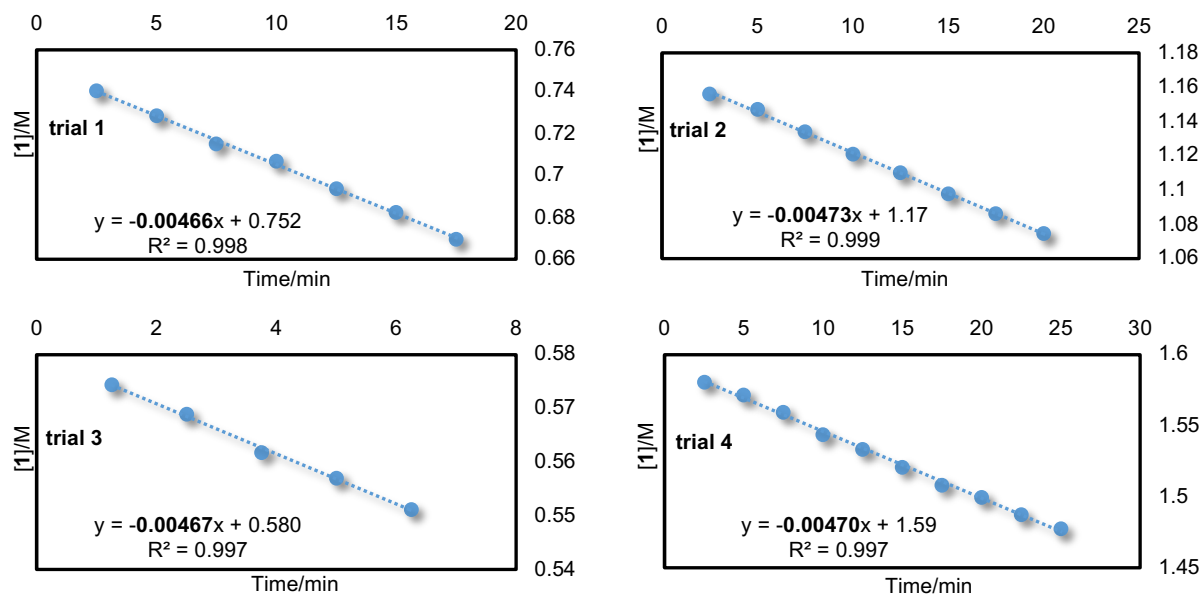

| Entry   | [1] (mol/L) | [2] (mol/L) | [(COD)Pd(CH <sub>2</sub> TMS) <sub>2</sub> ] (mol/L) | [L] (mol/L) | Initial Rate (M/min) |
|---------|-------------|-------------|------------------------------------------------------|-------------|----------------------|
| trial 1 | 0.800       | 1.60        | 0.0400                                               | 0.0400      | 0.00466              |
| trial 2 | 1.20        | 1.60        | 0.0400                                               | 0.0400      | 0.00473              |
| trial 3 | 0.600       | 1.60        | 0.0400                                               | 0.0400      | 0.00467              |
| trial 4 | 1.60        | 1.60        | 0.0400                                               | 0.0400      | 0.00470              |

Determination of the Reaction Order in Enyne 1:

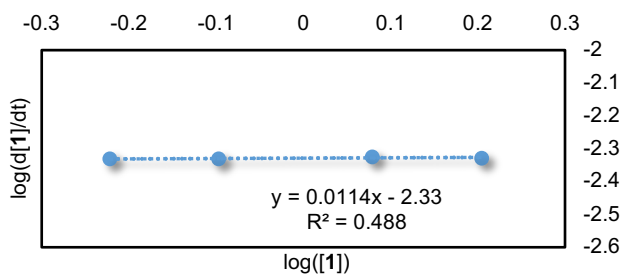

$\text{Log}(d[1]/dt)$  was plotted against  $\text{log}[1]$  to determine the initial reaction order for **1**. The slope of the plot indicates zero-order dependence with respect to enyne **1**.

### 3.2 Procedure for Reaction Order Determination for C-Boron Enolate **2**

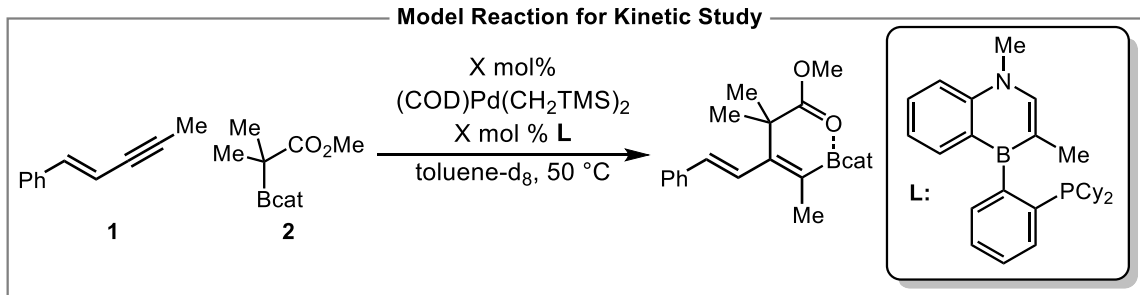

In a nitrogen-filled glovebox, (COD)Pd(CH<sub>2</sub>TMS)<sub>2</sub> (38.9 mg, 0.100 mmol) **L** (43.0 mg, 0.100 mmol) was dissolved in toluene-d<sub>8</sub> to prepare a **Stock Solution A** (0.500 mL, 0.200 M). Enyne **1** (427 mg, 3.00 mmol) was dissolved in toluene-d<sub>8</sub> to prepare a **Stock Solution B** (0.500 mL, 6.00 M). C-boron enolate **2** (880 mg, 4.00 mmol) was dissolved in toluene-d<sub>8</sub> to prepare a **Stock Solution C** (1.00 mL, 4.00 M).

For each kinetic run, a vial was charged with **Stock Solution A** (100 μL, 0.0200 mmol Pd/L), **Stock Solution B** (50 μL, 0.30 mmol **1**) and **Stock Solution C** (trial 5: 100 μL (0.400 mmol **2**), trial 7: 125 μL (0.500 mmol **2**), trial 6: 150 μL (0.600 mmol **2**), trial 3: 200 μL (0.800 mmol **2**), respectively) sequentially. The internal standard 1,2,4,5-tetramethylbenzene (26.8 mg, 0.200 mmol) was added to the reaction vial. Additional toluene-d<sub>8</sub> (trial 3: 150 μL, trial 6: 200 μL, trial 7: 225 μL, trial 5: 250 μL, respectively) was added to the reaction vessel to maintain an overall volume of 0.500 mL. Then the resulting homogeneous solution was quickly transferred to a J-Young tube. The J-Young tube was inserted into the preheated NMR probe (50.0 °C) and <sup>1</sup>H NMR spectra were acquired using a pre-acquisition delay in array mode for the length of the experiment. The raw data was then processed in MestReNova (peak integrations were normalized against 1,2,4,5-tetramethylbenzene as the internal standard.) and Microsoft® Excel to determine the initial rate of the reaction. The order dependence for **2** was derived as the slope of its log (initial rate) vs. log (starting concentration of **1**) plot.

Summary of reaction rates determined from disappearance of [1] over time by varying the concentration of [2]:

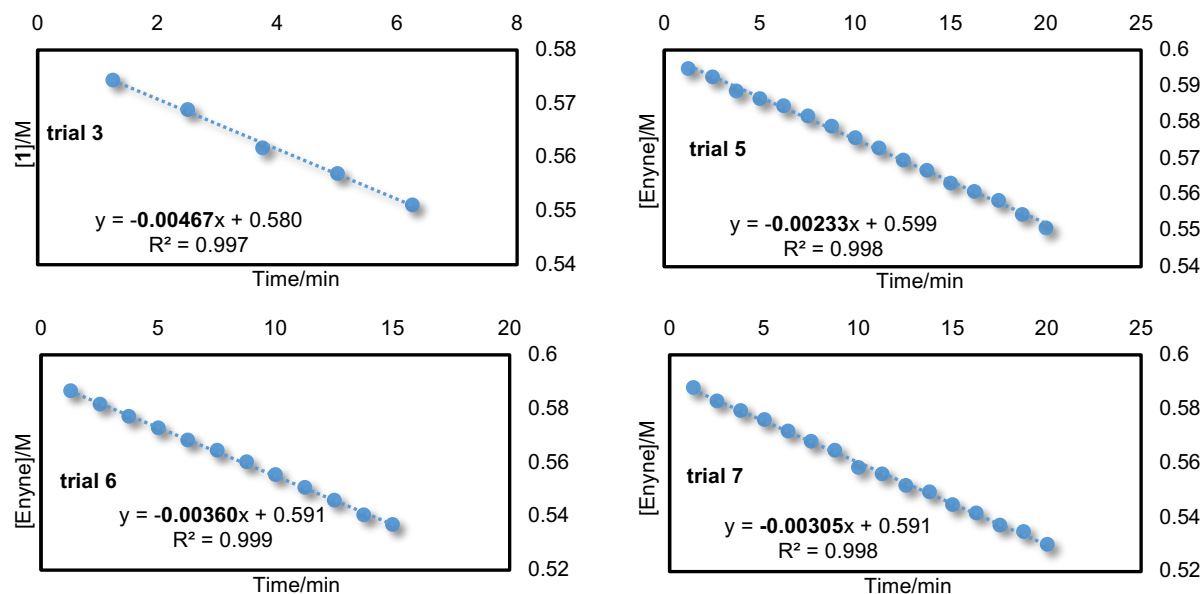

| Entry   | [1] (mol/L) | [2] (mol/L) | $[(\text{COD})\text{Pd}(\text{CH}_2\text{TMS})_2]$ (mol/L) | [L] (mol/L) | Initial Rate (M/min) |
|---------|-------------|-------------|------------------------------------------------------------|-------------|----------------------|
| trial 3 | 0.600       | 1.60        | 0.0400                                                     | 0.0400      | 0.00467              |
| trial 5 | 0.600       | 0.800       | 0.0400                                                     | 0.0400      | 0.00233              |
| trial 6 | 0.600       | 1.20        | 0.0400                                                     | 0.0400      | 0.00360              |
| trial 7 | 0.600       | 1.00        | 0.0400                                                     | 0.0400      | 0.00305              |

Determination of the Reaction Order in C-Boron Enolate 2:

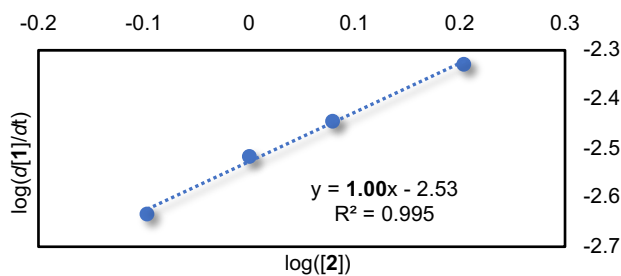

$\text{Log}(d[1]/dt)$  was plotted against  $\text{log}[2]$  to determine the initial reaction order for 2. The slope of the plot indicates first-order dependence with respect to C-Boron enolate 2.

### 3.3 Procedure for Reaction Order Determination on $[\text{Pd}/\text{L}_{\text{total}}]$



In a nitrogen-filled glovebox,  $(\text{COD})\text{Pd}(\text{CH}_2\text{TMS})_2$  (38.9 mg, 0.100 mmol) **L** (43.0 mg, 0.100 mmol) was dissolved in toluene- $d_8$  to prepare a **Stock Solution A** (0.500 mL, 0.200 M). Enyne **1** (427 mg, 3.00 mmol) was dissolved in toluene- $d_8$  to prepare a **Stock Solution B** (0.500 mL, 6.00 M). C-boron enolate **2** (880 mg, 4.00 mmol) was dissolved in toluene- $d_8$  to prepare a **Stock Solution C** (1.00 mL, 4.00 M).

For each kinetic run, a vial was charged with **Stock Solution A** (trial 9: 80  $\mu\text{L}$  (0.016 mmol Pd/L), trial 6: 100  $\mu\text{L}$  (0.200 mmol Pd/L), trial 10: 110  $\mu\text{L}$  (0.220 mmol Pd/L), trial 8: 150  $\mu\text{L}$  (0.300 mmol Pd/L), respectively), **Stock Solution B** (50  $\mu\text{L}$ , 0.30 mmol **1**) and **Stock Solution C** (150  $\mu\text{L}$ , 0.600 mmol **2**) sequentially. The internal standard 1,2,4,5-tetramethylbenzene (26.8 mg, 0.20 mmol) was added to the reaction vial. Additional toluene- $d_8$  (trial 8: 150  $\mu\text{L}$ , trial 10: 190  $\mu\text{L}$ , trial 6: 200  $\mu\text{L}$ , trial 9: 220  $\mu\text{L}$ , respectively) and was added to the reaction vessel to maintain an overall volume of 0.500 mL. Then the resulting homogeneous solution was quickly transferred to a J-Young tube. The J-Young tube was inserted into the preheated NMR probe (50.0 °C) and  $^1\text{H}$  NMR spectra were acquired using a pre-acquisition delay in array mode for the length of the experiment. The raw data was then processed in MestreNova (peak integrations were normalized against 1,2,4,5-tetramethylbenzene as the internal standard.) and Microsoft® Excel to determine the initial rate of the reaction. The order dependence for  $[\text{Pd}/\text{L}_{\text{total}}]$  was derived as the slope of its log (initial rate) vs. log (starting concentration of  $\text{Pd}/\text{L}_{\text{total}}$ ) plot.



Summary of reaction rates determined from disappearance of [1] over time by varying the concentration of  $[\text{Pd}/\text{L}_{\text{total}}]$ :

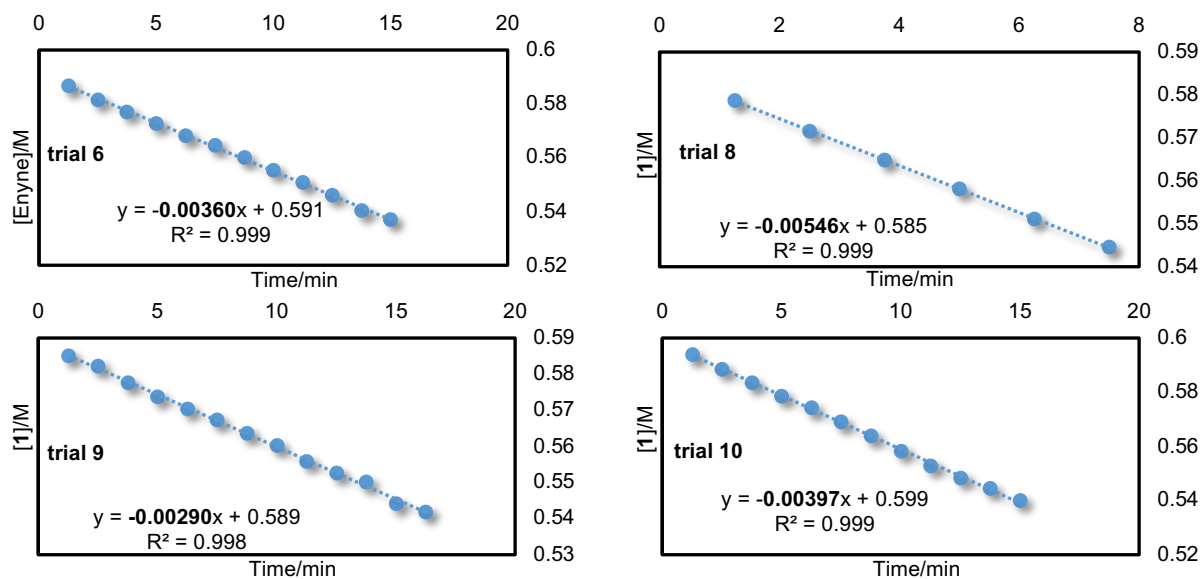

| Entry    | [1] (mol/L) | [2] (mol/L) | $[(\text{COD})\text{Pd}(\text{CH}_2\text{TMS})_2]$<br>(mol/L) | [L]<br>(mol/L) | Initial Rate<br>(M/min) |
|----------|-------------|-------------|---------------------------------------------------------------|----------------|-------------------------|
| trial 6  | 0.600       | 1.20        | 0.0400                                                        | 0.0400         | 0.00360                 |
| trial 8  | 0.600       | 1.20        | 0.0600                                                        | 0.0600         | 0.00546                 |
| trial 9  | 0.600       | 1.20        | 0.0320                                                        | 0.0320         | 0.00290                 |
| trial 10 | 0.600       | 1.20        | 0.0440                                                        | 0.0440         | 0.00397                 |

Determination of the Reaction Order in  $[\text{Pd}/\text{L}_{\text{total}}]$ :

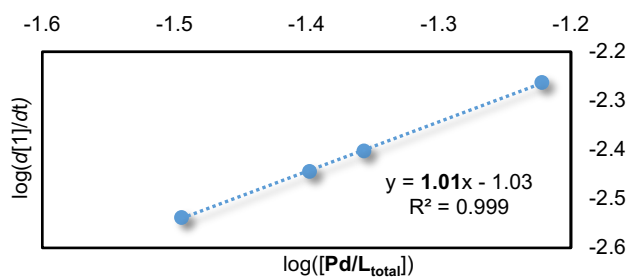

$\log(d[1]/dt)$  was plotted against  $\log[\text{Pd}/\text{L}_{\text{total}}]$  to determine the initial reaction order for  $\text{Pd}/\text{L}_{\text{total}}$ . The slope of the plot indicates first-order dependence with respect to enyne  $\text{Pd}/\text{L}_{\text{total}}$ .

#### 4. Hammett Study (Scheme 5)

To study the electronic effect of the aryl group in the 1,3-enyne on the reaction rate of the carboboration reaction, we performed a Hammett analysis.

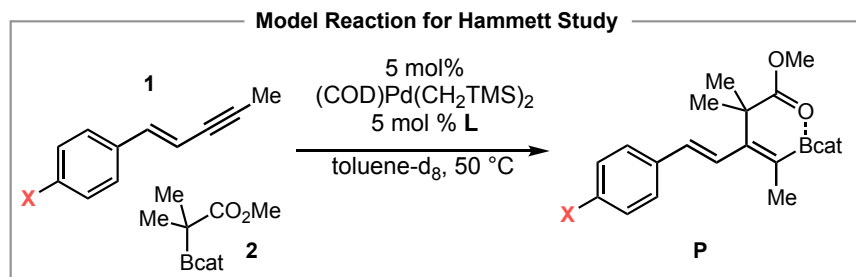

In a nitrogen-filled glovebox, (COD)Pd(CH<sub>2</sub>TMS)<sub>2</sub> (38.9 mg, 0.100 mmol) **L** (43.0 mg, 0.100 mmol) was dissolved in toluene-d<sub>8</sub> to prepare a **Stock Solution A** (0.500 mL, 0.200 M). C-boron enolate **2** (880 mg, 4.00 mmol) was dissolved in toluene-d<sub>8</sub> to prepare a **Stock Solution B** (1.00 mL, 4.00 M).

Four oven-dried 4 mL vials were charged with 0.400 mmol of **1a** (**X = Cl**) (70.4 mg), **1b** (**X = F**) (64.0 mg), **1c** (**X = Me**) (62.4 mg), **1d** (**X = OMe**) (68.8 mg), respectively. To each oven-dried vial was added **Stock Solution A** (100 μL, 0.0200 mmol Pd/L) and **Stock Solution B** (200 μL, 0.800 mmol **2**) sequentially. The internal standard 1,2,4,5-tetramethylbenzene (26.8 mg, 0.20 mmol) was added to each of the reaction vials. Additional toluene-d<sub>8</sub> (150 μL) was added to each of the reaction vessels to maintain an overall volume of 0.500 mL. Then the resulting homogeneous solution was quickly transferred to a J-young tube. The J-Young tube was inserted into the preheated NMR probe (50.0 °C) and <sup>1</sup>H NMR spectra were acquired using a pre-acquisition delay in array mode for the length of the experiment. The raw data was then processed in MestreNova (peak integrations were normalized against 1,2,4,5-tetramethylbenzene as the internal standard.) and Microsoft® Excel to determine the initial rate of the reaction.

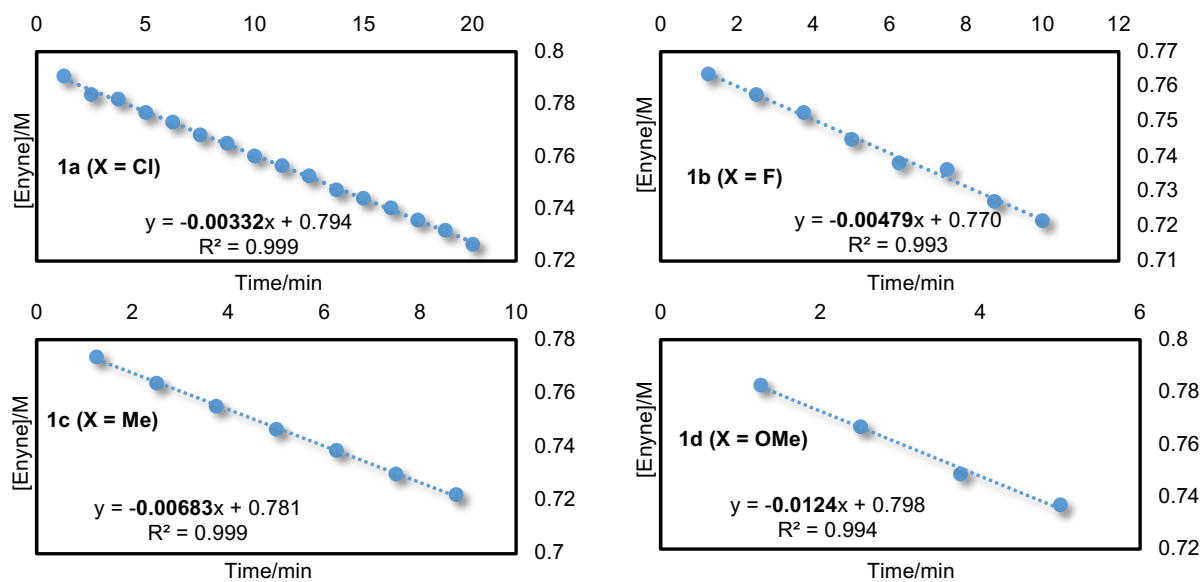

Summary of reaction rates determined from disappearance of [1] over time as a function of X:

| Entry               | [1x]<br>(mol/L) | [2]<br>(mol/L) | [(COD)Pd(CH <sub>2</sub> TMS) <sub>2</sub> ]<br>(mol/L) | [L]<br>(mol/L) | Initial Rate<br>(M/min) |
|---------------------|-----------------|----------------|---------------------------------------------------------|----------------|-------------------------|
| <b>1a (X = Cl)</b>  | 0.800           | 1.60           | 0.0400                                                  | 0.0400         | 0.00332                 |
| <b>1b (X = F)</b>   | 0.800           | 1.60           | 0.0400                                                  | 0.0400         | 0.00479                 |
| <b>1 (X = H)</b>    | 0.800           | 1.60           | 0.0400                                                  | 0.0400         | 0.00466                 |
| <b>1c (X = Me)</b>  | 0.800           | 1.60           | 0.0400                                                  | 0.0400         | 0.00683                 |
| <b>1d (X = OMe)</b> | 0.800           | 1.60           | 0.0400                                                  | 0.0400         | 0.0124                  |

Previously reported Hammett substituent constants<sup>1</sup> was used:

| Entry               | initial rate<br>(M/min) | $\log([\text{rate}_R]/[\text{rate}_{R=H}])$ | $\sigma_p$ | $\sigma_p^+$ | $\sigma_p^-$ |
|---------------------|-------------------------|---------------------------------------------|------------|--------------|--------------|
| <b>1a (X = Cl)</b>  | 0.00332                 | -0.147                                      | 0.23       | 0.11         | 0.19         |
| <b>1b (X = F)</b>   | 0.00479                 | 0.0114                                      | 0.06       | -0.07        | -0.03        |
| <b>1 (X = H)</b>    | 0.00466                 | 0                                           | 0          | 0            | 0            |
| <b>1c (X = Me)</b>  | 0.00683                 | 0.166                                       | -0.17      | -0.31        | -0.17        |
| <b>1d (X = OMe)</b> | 0.0124                  | 0.426                                       | -0.27      | -0.78        | -0.26        |

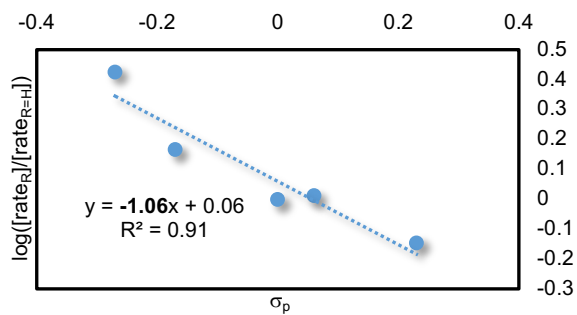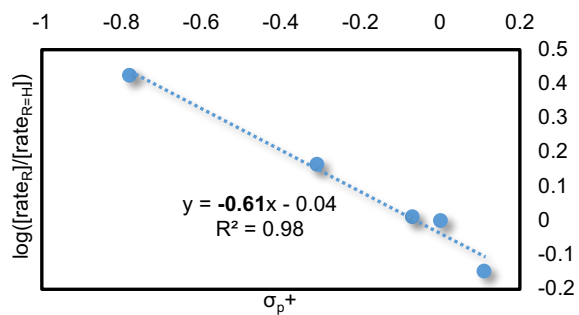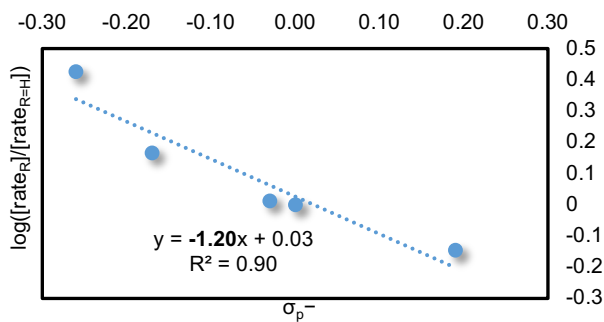

A linear fit with reported  $\sigma_p^+$  constants is observed whereas a less linear fit could be obtained with  $\sigma_p$  or  $\sigma_p^-$  constants. The  $\rho$  value determined from the Hammett plot ( $\sigma_p^+$ ) was  $-0.61$ , implying the development of some positive charge in the 1,3-enyne substrate during the transition from the resting state to the rate-limiting transition state.

## Hammett Study - Product Characterization

Following the NMR kinetic analysis associated with the Hammett study, the corresponding J-Young tube containing the reaction mixture was placed in 50 °C oil bath for 12 h to complete the reaction. At the conclusion of the reaction, the mixture was allowed to cool to room temperature. The mixture was transferred to a 20 mL vial with 2 mL CH<sub>2</sub>Cl<sub>2</sub> in a nitrogen-filled glovebox. A 2 mL CH<sub>2</sub>Cl<sub>2</sub> solution of pinacol (591 mg, 5.00 mmol, 10.0 equiv.) and Et<sub>3</sub>N (253 mg, 2.50 mmol, 5.00 equiv.) was added, and the resulting mixture was allowed to stir for 1 h at room temperature. Then, the mixture was concentrated *in vacuo*, and the crude residue was purified by silica gel column chromatography (2% EtOAc/Hexane to 5% EtOAc/Hexane as eluent) to afford the corresponding products as a yellow oil.

**P from enyne 1a (X = Cl):** 32% yield, 92:8 regioisomeric ratio.

<sup>1</sup>H NMR (600 MHz, CDCl<sub>3</sub>) δ 7.30 – 7.23 (m, 4H), 6.59 (dd, *J* = 16.5, 1.3 Hz, 1H), 6.29 (d, *J* = 16.6 Hz, 1H), 3.62 (s, 3H), 1.85 (d, *J* = 1.2 Hz, 3H), 1.42 (s, 6H), 1.29 (s, 12H). <sup>13</sup>C NMR (151 MHz, CDCl<sub>3</sub>) δ 177.9, 147.6, 136.1, 133.1, 131.6, 128.8, 128.2, 127.5, 83.7, 52.1, 48.7, 26.8, 24.9, 19.8. (*B*-alkenyl carbon signal not observed) <sup>11</sup>B NMR (160 MHz, CDCl<sub>3</sub>) δ 31.5.

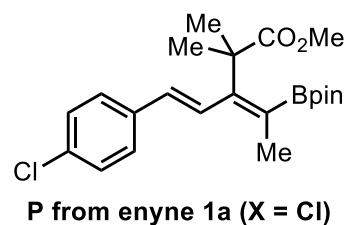

IR  $\nu$  2977, 2934, 1729, 1605, 1510, 1496, 1455, 1372, 1327, 1301, 1268, 1247, 1210, 1174, 1143, 1107, 1075, 1033, 966, 853, 836, 814, 746, 702 cm<sup>-1</sup>. HRMS (DART) calcd. for C<sub>22</sub>H<sub>31</sub>BO<sub>4</sub>Cl [M+H<sup>+</sup>]: 405.19984, found 405.20039.

**P from enyne 1b (X = F):** 85% yield, 97:3 regioisomeric ratio.

<sup>1</sup>H NMR (600 MHz, CDCl<sub>3</sub>) δ 7.35 – 7.30 (m, 2H), 7.02 – 6.96 (m, 2H), 6.53 (dd, *J* = 16.7, 1.4 Hz, 1H), 6.31 (d, *J* = 16.6 Hz, 1H), 3.63 (s, 3H), 1.87 (s, 3H), 1.43 (s, 6H), 1.30 (s, 12H). <sup>13</sup>C NMR (151 MHz, CDCl<sub>3</sub>) δ 177.9, 162.4 (d, *J* = 246.4 Hz), 147.7, 133.8 (d, *J* = 3.2 Hz), 131.7, 127.8 (d, *J* = 7.9 Hz), 127.3, 115.5 (d, *J* = 21.5 Hz), 83.7, 52.1, 48.8, 26.7, 24.9, 19.8. (*B*-alkenyl

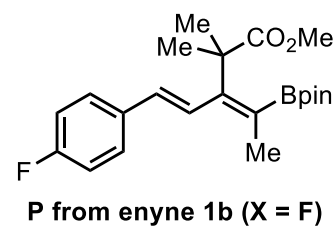

carbon signal not observed) <sup>11</sup>B NMR (192 MHz, CDCl<sub>3</sub>) δ 30.3. <sup>19</sup>F NMR (564 MHz, CDCl<sub>3</sub>) δ -114.8. IR  $\nu$  2978, 2934, 1730, 1600, 1508, 1459, 1372, 1330, 1296, 1262, 1229, 1144, 1077, 966, 852, 831, 813, 694, 520 cm<sup>-1</sup>. HRMS (DART) calcd. for C<sub>22</sub>H<sub>31</sub>BO<sub>4</sub>F [M+H<sup>+</sup>]: 389.22939, found 389.22920.

**P from enyne 1c (X = Me):** 88% yield, > 98:2 regioisomeric ratio.

**<sup>1</sup>H NMR** (500 MHz, CDCl<sub>3</sub>) δ 7.28 (d, *J* = 8.1 Hz, 2H), 7.13 (d, *J* = 7.9 Hz, 2H), 6.59 (dd, *J* = 16.5, 1.3 Hz, 1H), 6.34 (d, *J* = 16.6 Hz, 1H), 3.64 (s, 3H), 2.34 (s, 3H), 1.89 (d, *J* = 1.1 Hz, 3H), 1.45 (s, 6H), 1.32 (s, 12H).

**<sup>13</sup>C NMR** (126 MHz, CDCl<sub>3</sub>) δ 178.0, 148.1, 137.4, 134.9, 132.8, 129.4, 126.5, 126.3, 83.6, 52.1, 48.8, 26.8, 24.9, 21.3, 19.8. (*B*-alkenyl carbon

signal not observed) **<sup>11</sup>B NMR** (160 MHz, CDCl<sub>3</sub>) δ 31.2. **IR** ν 2978, 2930, 1732, 1511, 1459, 1372, 1331, 1297, 1264, 1212, 1192, 1145, 1079, 966, 851, 802 cm<sup>-1</sup>. **HRMS** (DART) calcd. for C<sub>23</sub>H<sub>34</sub>BO<sub>4</sub> [M+H<sup>+</sup>]: 385.25447, found 385.25597.

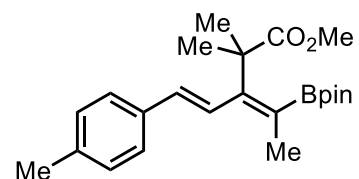

**P from enyne 1c (X = Me)**

**P from enyne 1d (X = OMe):** 83% yield, > 98:2 regioisomeric ratio.

**<sup>1</sup>H NMR** (500 MHz, CDCl<sub>3</sub>) δ 7.31 (d, *J* = 8.7 Hz, 2H), 6.85 (d, *J* = 8.7 Hz, 2H), 6.49 (dd, *J* = 16.6, 1.2 Hz, 1H), 6.31 (d, *J* = 16.5 Hz, 1H), 3.80 (s, 3H), 3.63 (s, 3H), 1.88 (d, *J* = 1.1 Hz, 3H), 1.44 (s, 6H), 1.31 (s, 12H).

**<sup>13</sup>C NMR** (126 MHz, CDCl<sub>3</sub>) δ 178.1, 159.3, 148.1, 132.3, 130.5, 127.5, 125.4, 114.1, 83.6, 55.4, 52.0, 48.8, 26.7, 24.9, 19.8. (*B*-alkenyl carbon

signal not observed) **<sup>11</sup>B NMR** (160 MHz, CDCl<sub>3</sub>) δ 31.2. **IR** ν 2976, 2933, 1728, 1605, 1576, 1510, 1463, 1443, 1371, 1328, 1296, 1246, 1211, 1173, 1143, 1077, 1033, 965, 916, 851, 830, 812, 771, 732, 694, 673, 647, 578, 525 cm<sup>-1</sup>. **HRMS** (DART) calcd. for C<sub>23</sub>H<sub>34</sub>BO<sub>5</sub> [M+H<sup>+</sup>]: 401.24938, found 401.24917.

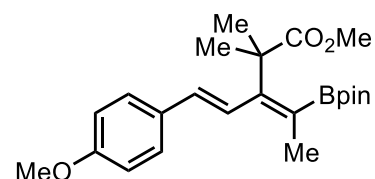

**P from enyne 1d (X = OMe)**

## 5. Arrhenius Analysis and Eyring Analysis (Scheme 6)

To obtain experimental activation parameters of the carboboration reaction, we performed the Arrhenius and Eyring analysis. The reaction rate constant was obtained via initial rate kinetic analysis via  $^1\text{H}$  NMR spectroscopy.

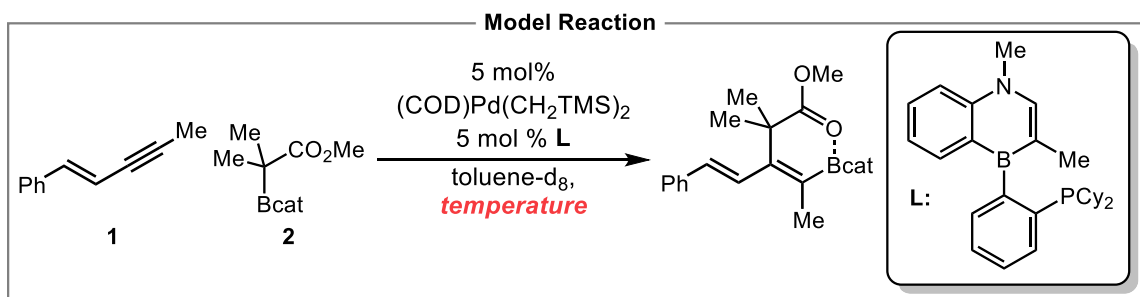

In a nitrogen-filled glovebox,  $(\text{COD})\text{Pd}(\text{CH}_2\text{TMS})_2$  (38.9 mg, 0.100 mmol) **L** (43.0 mg, 0.100 mmol) was dissolved in toluene- $\text{d}_8$  to prepare a **Stock Solution A** (0.500 mL, 0.200 M). Enyne **1** (427 mg, 3.00 mmol) was dissolved in toluene- $\text{d}_8$  to prepare a **Stock Solution B** (0.500 mL, 0.600 M). C-boron enolate **2** (880 mg, 4.00 mmol) was dissolved in toluene- $\text{d}_8$  to prepare a **Stock Solution C** (1.00 mL, 4.00 M).

For each run, a vial was charged with **Stock Solution A** (100  $\mu\text{L}$ , 0.0200 mmol Pd/L), **Stock Solution B** (50  $\mu\text{L}$ , 0.30 mmol **1**) and **Stock Solution C** (200  $\mu\text{L}$ , 0.800 mmol **2**) sequentially. The internal standard 1,2,4,5-tetramethylbenzene (26.8 mg, 0.20 mmol) was added to the reaction vial. Additional toluene- $\text{d}_8$  (150  $\mu\text{L}$ ) was added to the reaction vessel to maintain an overall volume of 0.500 mL. Then the resulting homogeneous solution was quickly transferred to a J-Young tube. The J-Young tube was inserted into the preheated NMR probe ( $T = 25.0, 34.0$  or  $42.0$   $^\circ\text{C}$ , respectively) and  $^1\text{H}$  NMR spectra were acquired using a pre-acquisition delay in array mode for the length of the experiment. The raw data was then processed in MestreNova (peak integrations were normalized against 1,2,4,5-tetramethylbenzene as the internal standard.) and Microsoft $^\circledR$  Excel to determine the initial rate of the reaction.

Summary of reaction rates determined from disappearance of [1] over time at different temperature:

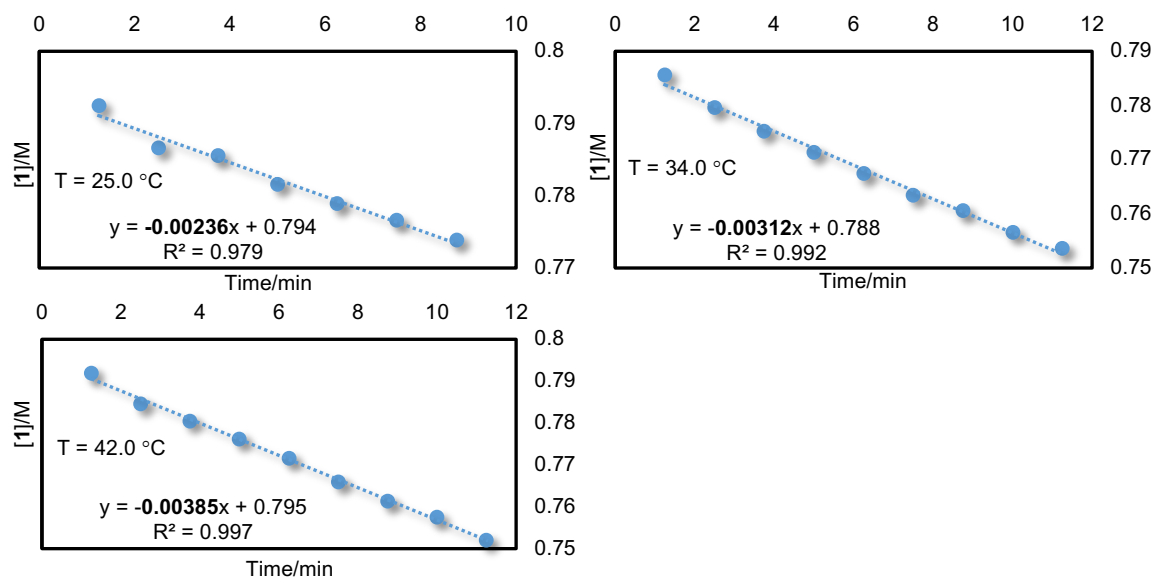

### Arrhenius Analysis:

| T (°C) | 1/T(K <sup>-1</sup> ) | k <sub>obs</sub><br>(M/min) | k <sub>obs</sub> (M/s) | k(M <sup>-1</sup> s <sup>-1</sup> ) | lnk      |
|--------|-----------------------|-----------------------------|------------------------|-------------------------------------|----------|
| 50.0   | 0.00309               | 0.00466                     | 0.0000777              | 0.00121                             | -0.00671 |
| 42.0   | 0.00317               | 0.00385                     | 0.0000642              | 0.00100                             | -0.00690 |
| 34.0   | 0.00326               | 0.00312                     | 0.0000521              | 0.000814                            | -0.00711 |
| 25.0   | 0.00335               | 0.00236                     | 0.0000393              | 0.000614                            | -0.00739 |

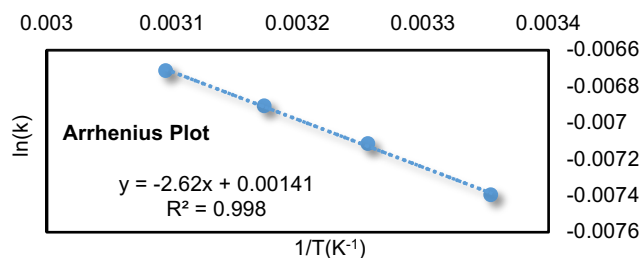

Arrhenius equation:  $k = Ae^{\frac{-E_a}{RT}}$ . Taking natural logarithm yields:  $\ln k = \frac{-E_a}{R} \cdot \frac{1}{T} + \ln A$ .

With  $R$  as the gas constant ( $R = 8.31441 \text{ J/K/mol}$ ) and  $T$  as the reaction temperature ( $T = 323.15 \text{ K}$ ), the  $E_a$  was calculated from the slope and the  $A$  was calculated from the intercept of the Arrhenius plot:  $E_a = 5.21 \pm 0.14 \text{ kcal/mol}$ ,  $A = 4.10 \pm 0.96 \text{ M}^{-1}\text{s}^{-1}$ .



### Eyring Analysis:

| T (°C) | 1/T(K <sup>-1</sup> ) | k <sub>obs</sub> (M/min) | k <sub>obs</sub> (M/s) | k(M <sup>-1</sup> s <sup>-1</sup> ) | Rln(kh/k <sub>B</sub> T) (kcal·K <sup>-1</sup> ·mol <sup>-1</sup> ) |
|--------|-----------------------|--------------------------|------------------------|-------------------------------------|---------------------------------------------------------------------|
| 50.0   | 0.00309               | 0.00466                  | 0.0000777              | 0.00121                             | -0.0720                                                             |
| 42.0   | 0.00317               | 0.00385                  | 0.0000642              | 0.00100                             | -0.0723                                                             |
| 34.0   | 0.00326               | 0.00312                  | 0.0000521              | 0.000814                            | -0.0727                                                             |
| 25.0   | 0.00335               | 0.00236                  | 0.0000393              | 0.000614                            | -0.0732                                                             |

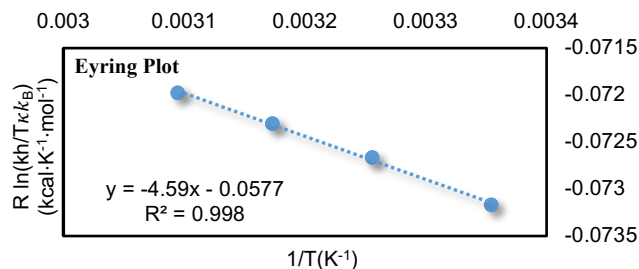

Eyring equation:  $k = \frac{\kappa k_B T}{h} e^{-\frac{\Delta G^\ddagger}{RT}} = \frac{\kappa k_B T}{h} e^{-\frac{\Delta H^\ddagger}{RT}} e^{\frac{\Delta S^\ddagger}{R}}$ . Taking natural logarithm yields:

$$\ln \frac{k}{T} = \ln \frac{\kappa k_B}{h} + \frac{-\Delta H^\ddagger}{R} \cdot \frac{1}{T} + \frac{\Delta S^\ddagger}{R}$$

Rearranging as:  $R \cdot \ln \frac{kh}{T \kappa k_B} = -\Delta H^\ddagger \cdot \frac{1}{T} + \Delta S^\ddagger$ .

With  $R$  as the gas constant ( $R = 8.31441 \text{ J/K/mol}$ ),  $T$  as the reaction temperature (here  $T = 323.15 \text{ K}$ ),  $h$  as Planck's constant ( $h = 6.62617 \cdot 10^{-34} \text{ J}\cdot\text{s}$ ),  $k_B$  as the Boltzmann constant ( $k_B = 1.380662 \cdot 10^{-23} \text{ J}\cdot\text{K}^{-1}$ ) and the statistical factor  $\kappa$  set to 1.0,  $\Delta H^\ddagger$  was calculated from the slope and  $\Delta S^\ddagger$  was calculated from the intercept of the Eyring plot:  $\Delta H^\ddagger = 4.59 \pm 0.15 \text{ kcal/mol}$ ,  $\Delta S^\ddagger = -57.75 \pm 0.48 \text{ eu}$ ,  $\Delta G_{323}^\ddagger = \Delta H^\ddagger - T\Delta S^\ddagger = 23.25 \pm 0.22 \text{ kcal/mol}$ .

## 6. BN vs CC: Ligand Performance Comparison (Scheme 7)

We compared the performance of Senphos (BN ligand) and its carbonaceous version (CC ligand) under otherwise identical condition by  $^1\text{H}$  NMR analysis to obtain the 1,3-enyne concentration over time profile.

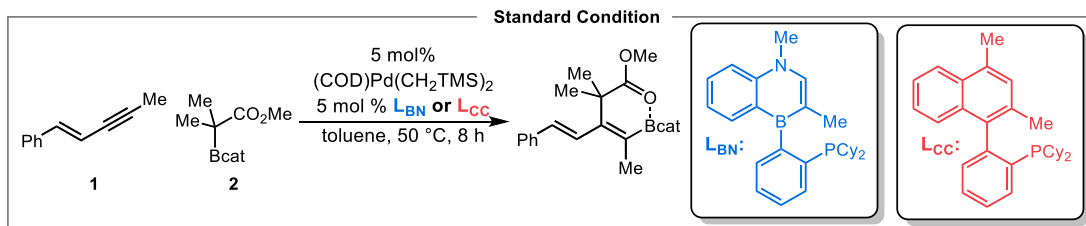

In a nitrogen-filled glovebox, to an oven-dried 4 mL vial was added  $(\text{COD})\text{Pd}(\text{CH}_2\text{TMS})_2$  (7.8 mg, 0.020 mmol)  $\text{L}_{\text{BN}}$  (8.6 mg, 0.020 mmol) or  $\text{L}_{\text{CC}}$  (8.6 mg, 0.020 mmol) in toluene- $d_8$  (100  $\mu\text{L}$ ). The resulting mixture was allowed to stir at room temperature for 10 min before adding **1** (56.9 mg, 0.400 mmol) and **2** (176 mg, 0.800 mmol) in toluene- $d_8$  (100  $\mu\text{L}$ ). The internal standard 1,2,4,5-tetramethylbenzene (26.8 mg, 0.200 mmol) was then added to the reaction vial. Additional toluene- $d_8$  (150  $\mu\text{L}$ ) was added to the solution to maintain an overall 0.500 mL volume. The resulting homogeneous solution was quickly transferred to J-Young tube. The J-Young tube was inserted into the preheated NMR probe ( $T = 50\text{ }^\circ\text{C}$ ) and  $^1\text{H}$  NMR/ $^{31}\text{P}$  NMR spectra were acquired using a pre-acquisition delay in array mode for the length of the experiment. The raw data of  $^1\text{H}$  NMR was then processed in MestReNova (peak integrations were normalized against 1,2,4,5-tetramethylbenzene as the internal standard) and Microsoft® Excel to obtain the concentration of **1** over time profile. The  $^{31}\text{P}$  NMR was processed in MestReNova to observe the formation and disappearance of the resting state Pd-enyne complex. The signal for Pd/ $\text{L}_{\text{BN}}$ -enyne complex in  $^{31}\text{P}$  NMR persisted for ca. 4.0 hours, consistent with the reaction progress. The signal for Pd/ $\text{L}_{\text{CC}}$  complex in  $^{31}\text{P}$  NMR persisted for ca. 1.5 hours, consistent with catalyst decomposition after 1.5 hours.

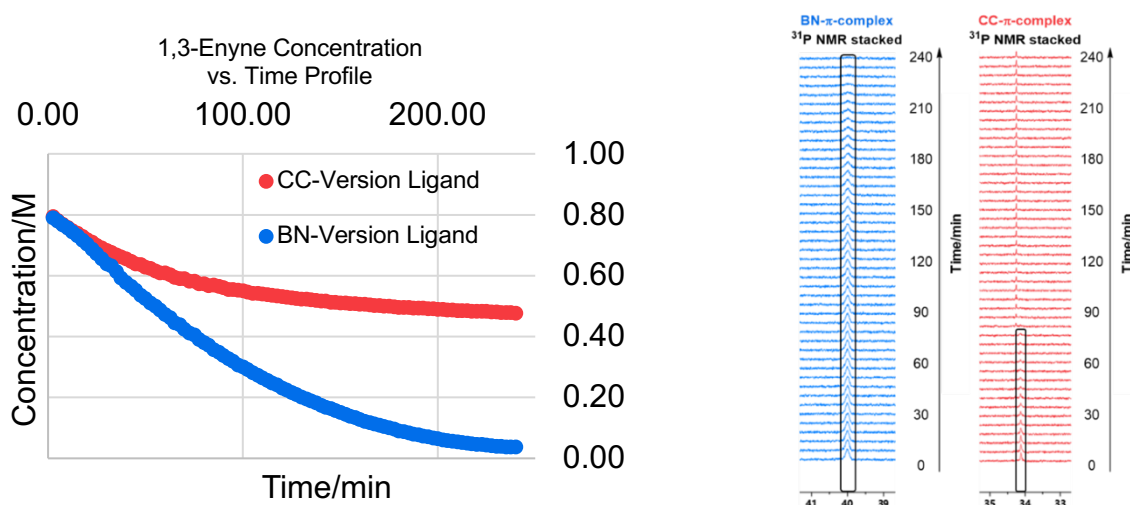

## 7. Computational Details (Figures 1-2)

All calculations were performed on the real systems with the Gaussian 09 package<sup>2</sup> and the TPSS<sup>3</sup> functional with D3 dispersion correction of Grimme with Becke–Johnson damping (DFT-*D3(BJ)*)<sup>4</sup>. The palladium atom was described with the relativistic electron core potential SDD and associated basis set, augmented by a set of f-orbital polarization functions.<sup>5</sup> The 6-31G\*\* basis set was employed for all other atoms. All stationary points involved were fully optimized by considering solvent effect (Toluene) by means of the universal Solvation Model based on solute electron Density (SMD).<sup>6</sup> Frequency calculations were undertaken to confirm the nature of the stationary points, yielding one imaginary frequency for transition states (TS), corresponding to the expected process, and all frequencies are positive for *minima*. The connectivity of the transition states and their adjacent *minima* was confirmed by intrinsic reaction coordinate (IRC)<sup>7</sup> calculations. Standard thermodynamic corrections (T = 298 K, 1 atm) have been considered to express reaction paths in terms of standard Gibbs free energies.

NBO analysis (NBO 7.0 version)<sup>8</sup> was used to gain more insight on the bonding situation in the Pd-enyne complex and in the transition state **TS2** associated with the *syn* outer sphere oxidative addition mechanism (O→Pd interaction in the C-B to Pd-O enolate isomerization). Stabilizing interactions ( $\Delta E(2)$  in kcal/mol), determined at second order perturbation theory, have been computed to get insight on donor-acceptor interactions. Natural Localized Molecular Orbitals (NLMO) have also been determined.

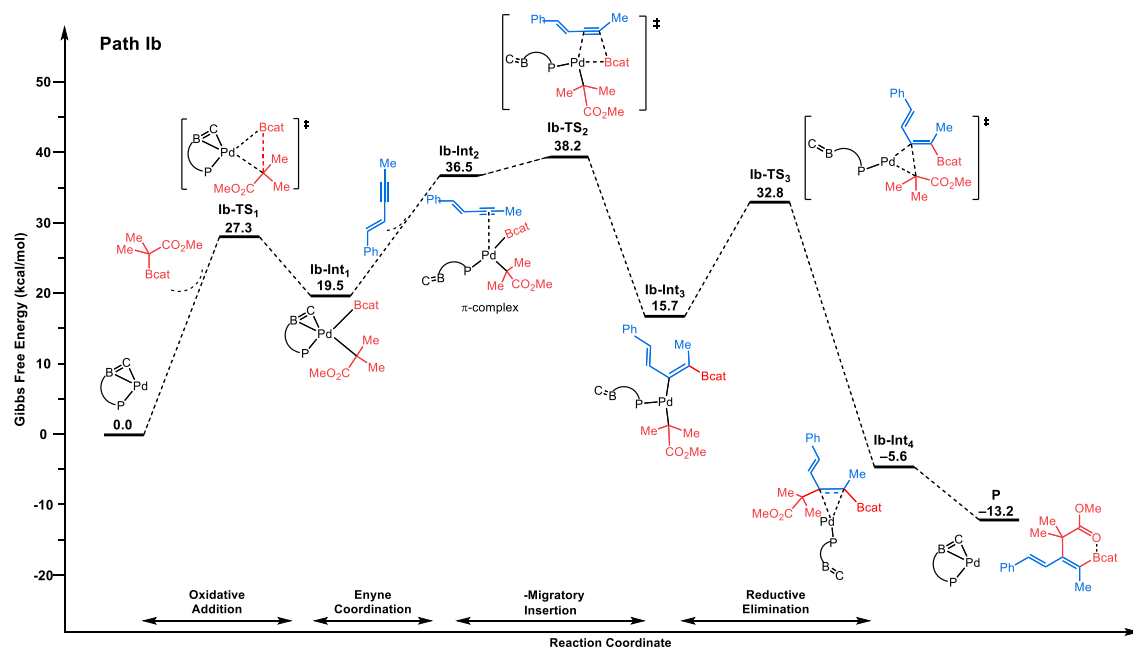

**Figure S1.** Energy profile ( $\Delta G$  in kcal/mol) computed at SMD(Toluene)-TPSS-D3(BJ)/SDD+f(Pd), 6-31G\*\*(other atoms) level of theory for the inner-sphere mechanism involving direct oxidative addition pathway of C-boron enolate to Pd. Path Ib is shown: Bcat moiety *trans* to phosphorus of the 1,4-azaborine-Senphos ligand.

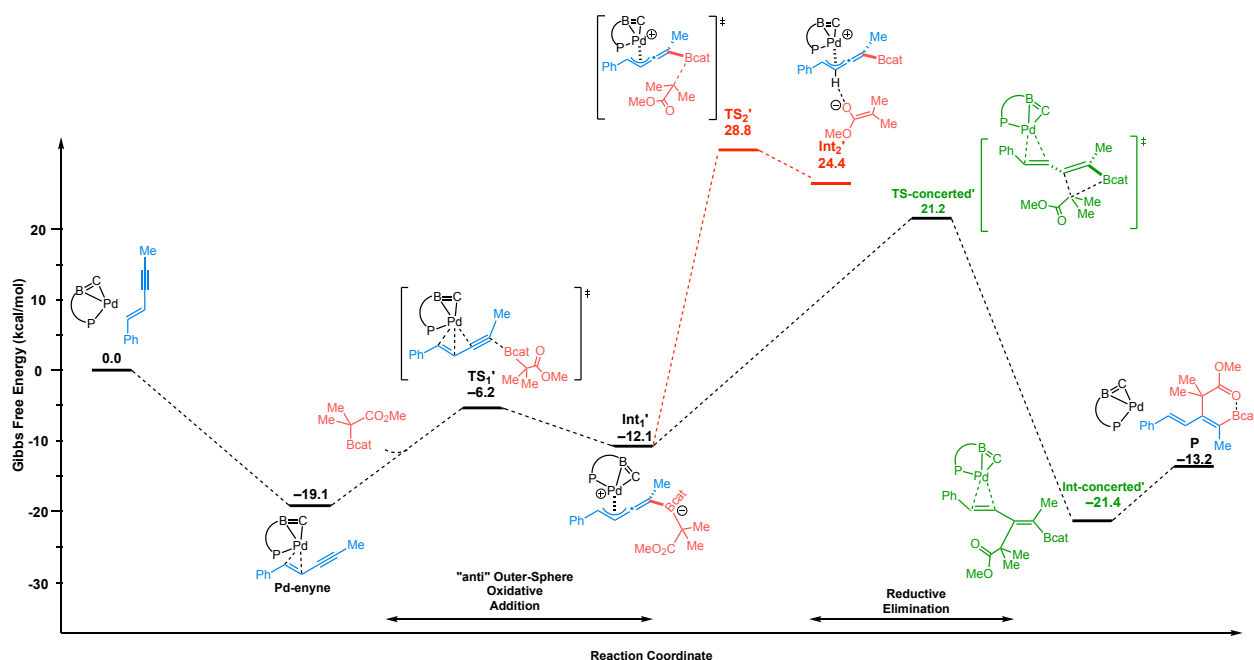

**Figure S2.** Energy profiles ( $\Delta G$  in kcal/mol) computed at SMD(Toluene)-TPSS-D3(BJ)/SDD+f(Pd), 6-31G\*\*(other atoms) level of theory for the *anti* outer-sphere oxidative addition mechanism, involving B-C bond cleavage without assistance of O $\rightarrow$ Pd interaction (red path). Concerted reductive elimination (green path) was also considered.

For the *anti* outer-sphere oxidative addition mechanism, starting from the  $\pi$ -complex, the activation barrier for the oxidation-addition step is 12.9 kcal/mol, indicating a feasible process. A  $\eta^3$ -Pd-allyl complex **Int<sub>1</sub>'** is formed through an endergonic step from the resting state. From this oxidative addition product **Int<sub>1</sub>'**, two scenarios have been investigated to explain the formation of the *cis*-carboboration product: a one-step pathway with concerted breaking of B-C bond and formation of the C-C bond through a 4-membered ring TS (**green pathway**), or a two-step pathway involving B-C bond cleavage and then C-C bond formation (**red pathway**). The 4-membered ring transition state lies very high in energy above the  $\pi$ -complex ( $\Delta G^\ddagger$ : 40.3 kcal/mol, **green pathway**), which makes the process less feasible by this route. DFT calculations have also shown that the alternative stepwise pathway (**red pathway**) can be also ruled out due to the very high activation energy barrier of the B-C bond cleavage step ( $\Delta G^\ddagger$ : 47.9 kcal/mol from the resting state).

**Table S1.** Thermodynamic data at 25°C for transition states of the *syn*-outer-sphere oxidative addition mechanism, involving B-C bond cleavage with assistance of O→Pd interaction **TS2** or Pd-O/B-O isomerization and reductive elimination **TS3** (black path, Figure 2).

|                                      | <b>TS2</b> | <b>TS3</b> | <b>Exp</b>               |
|--------------------------------------|------------|------------|--------------------------|
| $\Delta H^\ddagger(\text{kcal/mol})$ | 3.3        | 4.5        | $4.59 \pm 0.15$          |
| $\Delta S^\ddagger(\text{e.u.})$     | -65.3      | -62.3      | $-58 \pm 1 \text{ e.u.}$ |
| $\Delta G^\ddagger(\text{kcal/mol})$ | 22.8       | 23.1       | $23.25 \pm 0.22$         |

**Figure S3.** Optimized structures (main distances in Å) for all *minima* and transition states for the proposed *syn*-outer sphere oxidative addition mechanism involving B-C bond cleavage with assistance of O→Pd interaction **TS2**, Pd-O/B-O isomerization, and reductive elimination **TS3** (black path, Figure 2).

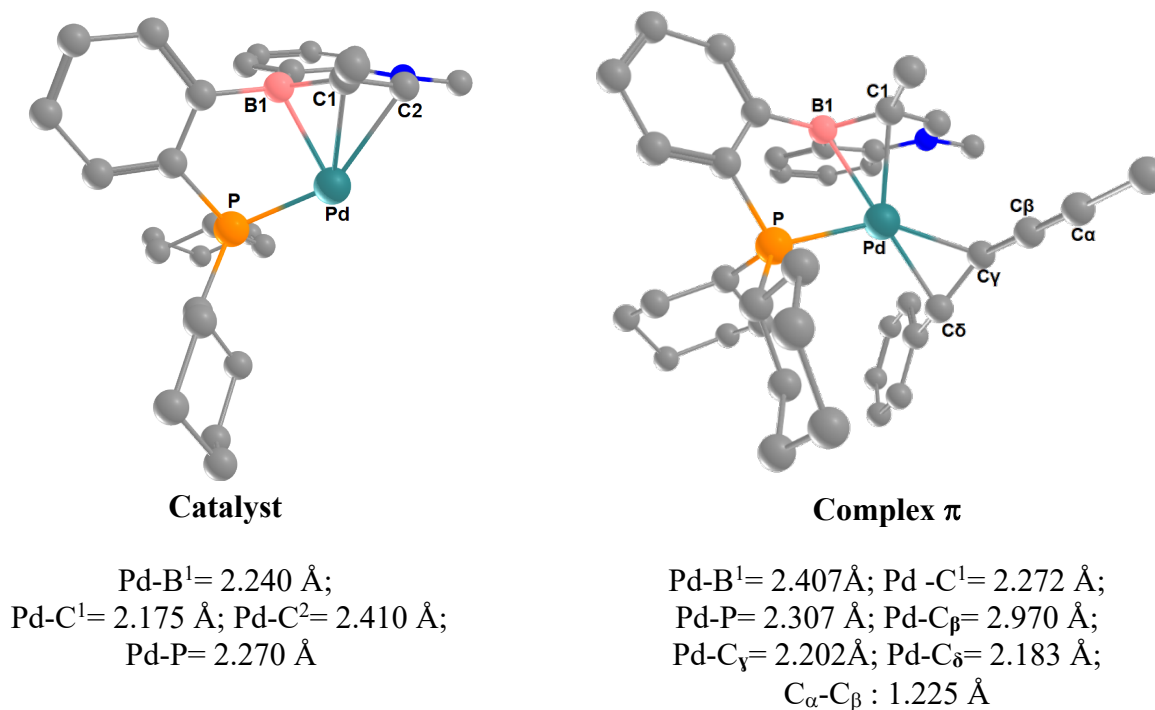

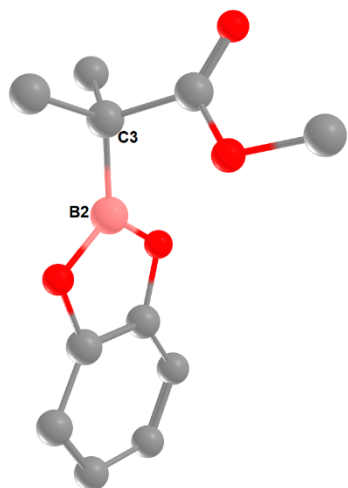

**C-boron enolate**

$B^2-C_3 = 1.578 \text{ \AA}$

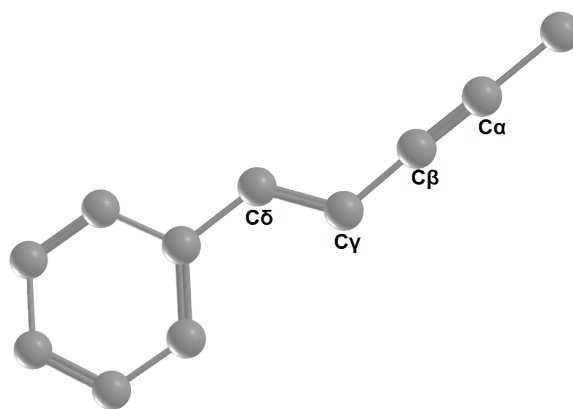

**Enyne**

$C^\alpha-C^\beta : 1.22396 \text{ \AA}; C_\beta - C_\gamma = 1.416 \text{ \AA}$   
 $C_\gamma - C_\delta = 1.362 \text{ \AA}$

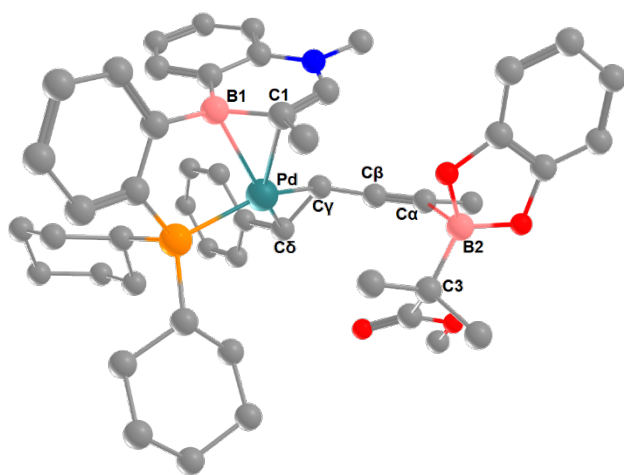

**TS1**

$Pd-B^1 = 2.366 \text{ \AA}; Pd-C^1 = 2.347 \text{ \AA};$   
 $Pd-C_\beta = 3.111 \text{ \AA};$   
 $Pd-C_\gamma = 2.162 \text{ \AA}; Pd-C_\delta = 2.170 \text{ \AA};$   
 $B^2-C_\alpha = 2.291 \text{ \AA}; C_\alpha-C_\beta : 1.247 \text{ \AA}$

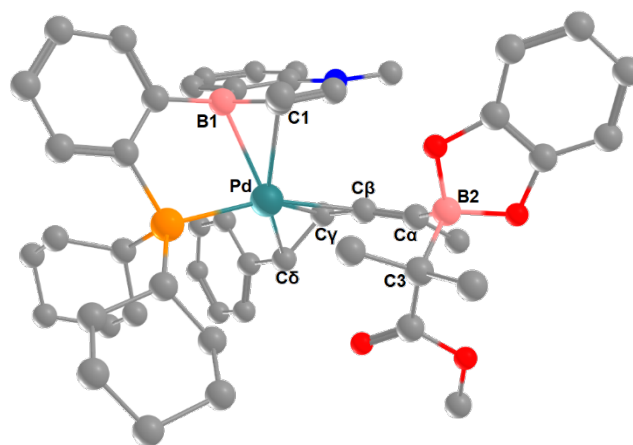

**Int1**

$Pd-B^1 = 2.425 \text{ \AA}; Pd-C^1 = 2.382 \text{ \AA};$   
 $Pd-C_\beta = 2.367 \text{ \AA};$   
 $Pd-C_\gamma = 2.158 \text{ \AA}; Pd-C_\delta = 2.215 \text{ \AA};$   
 $B^2-C_\alpha = 1.653 \text{ \AA}; C_\alpha-C_\beta : 1.310 \text{ \AA}$

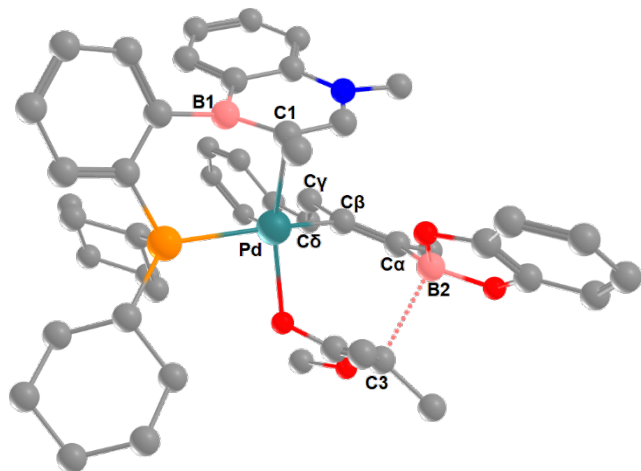

**TS2**

Pd-B<sup>1</sup> = 2.634 Å; Pd-C<sup>1</sup> = 2.196 Å;  
 Pd-C<sub>β</sub> = 2.058 Å;  
 Pd-C<sub>γ</sub> = 2.706 Å; Pd-C<sub>δ</sub> = 3.870 Å;  
 B<sup>2</sup>-C<sub>α</sub> = 1.563 Å; C<sub>α</sub>-C<sub>β</sub> : 1.355 Å; Pd-O = 2.138 Å

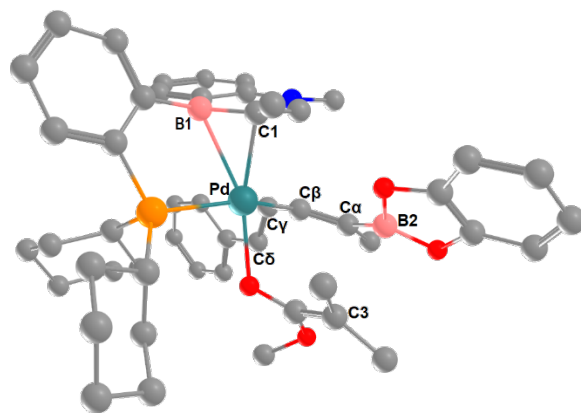

**Int2**

Pd-B<sup>1</sup> = 2.540 Å; Pd-C<sup>1</sup> = 2.211 Å;  
 Pd-C<sub>β</sub> = 2.067 Å;  
 Pd-C<sub>γ</sub> = 2.682 Å; Pd-C<sub>δ</sub> = 3.730 Å;  
 B<sup>2</sup>-C<sub>α</sub> = 1.535 Å; C<sub>α</sub>-C<sub>β</sub> : 1.360 Å; Pd-O = 2.130 Å

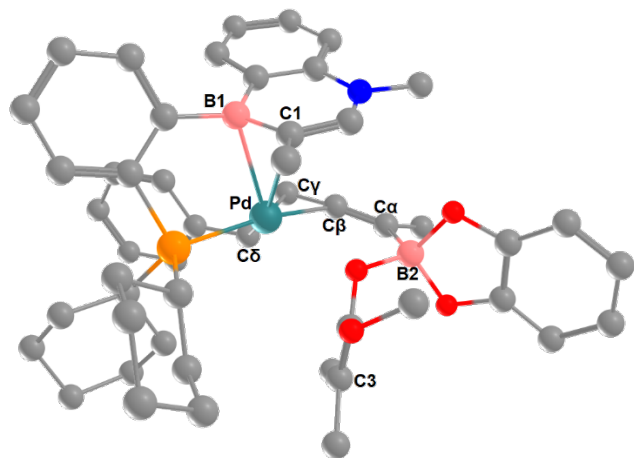

**Int3**

Pd-B<sup>1</sup> = 2.476 Å; Pd-C<sup>1</sup> = 2.503 Å;  
 Pd-C<sub>β</sub> = 2.181 Å;  
 Pd-C<sub>γ</sub> = 2.168 Å; Pd-C<sub>δ</sub> = 2.231 Å;  
 B<sup>2</sup>-C<sub>α</sub> = 1.630 Å; C<sub>α</sub>-C<sub>β</sub> : 1.320 Å; B<sup>2</sup>-O = 1.517 Å

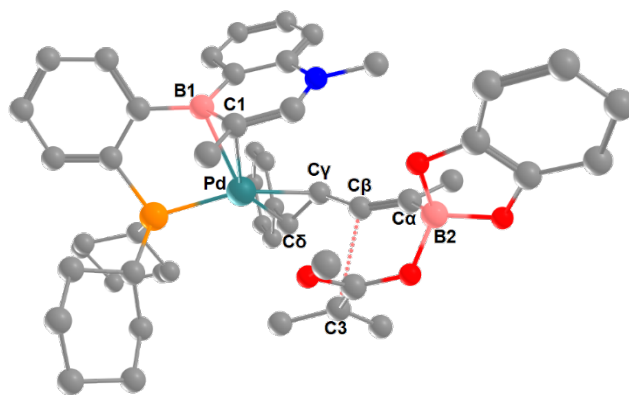

**TS3**

Pd-B<sup>1</sup> = 2.374 Å; Pd-C<sup>1</sup> = 2.333 Å;  
 Pd-C<sub>β</sub> = 3.062 Å;  
 Pd-C<sub>γ</sub> = 2.170 Å; Pd-C<sub>δ</sub> = 2.171 Å;  
 B<sup>2</sup>-C<sub>α</sub> = 1.642 Å; C<sub>α</sub>-C<sub>β</sub> : 1.307 Å; C<sub>β</sub>-C<sub>3</sub> = 2.681 Å



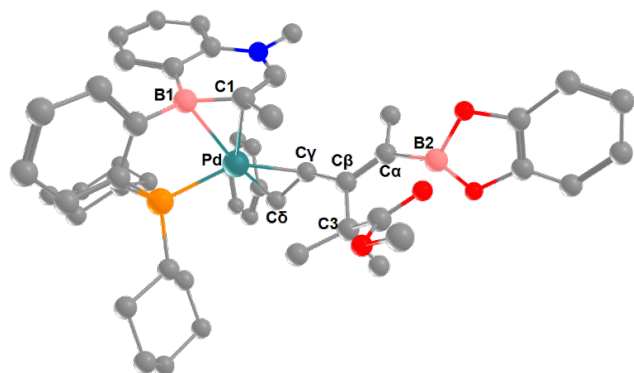

**Int4**

Pd-B<sup>1</sup> = 2.361 Å; Pd -C<sup>1</sup> = 2.264 Å;  
 Pd-C<sub>β</sub> = 3.153 Å;  
 Pd-C<sub>γ</sub> = 2.226 Å; Pd-C<sub>δ</sub> = 2.205 Å;  
 B<sup>2</sup>-C<sub>α</sub> = 1.590 Å; C<sub>α</sub>-C<sub>β</sub> : 1.370 Å ; B<sup>2</sup>-O = 1.642 Å

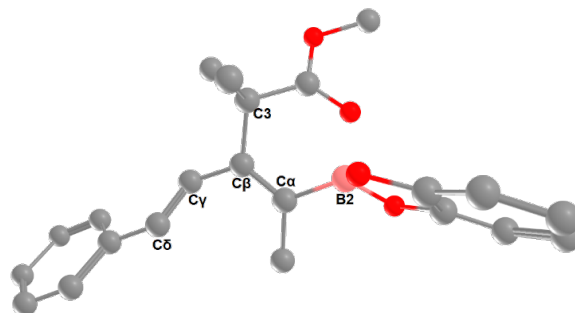

**P**

C<sub>α</sub>-C<sub>β</sub> : 1.362 Å; C<sub>β</sub> - C<sub>γ</sub> = 1.472 Å  
 C<sub>γ</sub> - C<sub>δ</sub> = 1.357 Å;  
 B<sup>2</sup>-C<sub>α</sub> = 1.590 ; B<sup>2</sup>-O = 1.663 Å

**Table S2.** NBO analysis for the  $\pi$ -Pd-enyne complex. Stabilizing interaction  $\Delta E(2)$  at the 2<sup>nd</sup> order perturbation theory in kcal/mol, associated to the donation  $C=C \rightarrow Pd$  and the back-donation  $Pd \rightarrow C=C$ . Plot of the associated Natural Localized Molecular Orbital (NLMO, cutoff : 0.04), with percentage of the main atoms (%) involved in each NLMO.

|                                                                                   | NBO analysis<br>Pd-enyne complex |                                 |
|-----------------------------------------------------------------------------------|----------------------------------|---------------------------------|
|                                                                                   | $\Delta E(2)$                    | NLMO                            |
| <b>Donation</b><br>$\pi_{C=C}(\text{enyne}) \rightarrow s(\text{Pd})$             | 44.9                             | 4.4% Pd<br>41.4% C1<br>46.3% C2 |
| <b>Back-donation</b><br>$d_{xy}(\text{Pd}) \rightarrow \pi^*_{C=C}(\text{enyne})$ | 35.3                             | 78.9% Pd<br>8.1% C1<br>7.1% C2  |

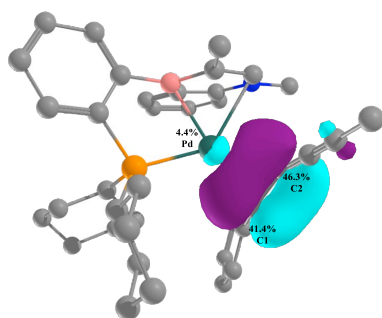

Donation  
 $\pi_{C=C} \rightarrow s(\text{Pd})$

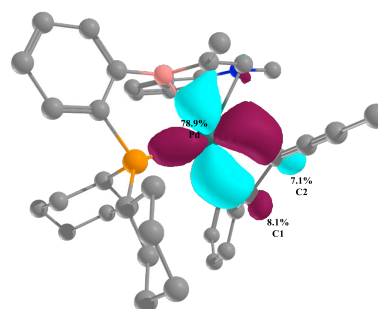

Back-donation  
 $d_{xy}(\text{Pd}) \rightarrow \pi^*_{C=C}$

**Table S3.** NBO analysis for the transition state **TS2**, associated to the *syn* outer sphere oxidative addition mechanism (C-B to Pd-O enolate isomerization). Stabilizing interaction  $\Delta E(2)$  at the 2<sup>nd</sup> order perturbation theory in kcal/mol for the O→Pd interaction. Plot of the NLMO (cutoff : 0.04) associated to the main O→Pd interaction (lone pair: LP3(O)) with percentage of the main atoms (%).

|          |                           | NBO analysis<br>TS2 |             |
|----------|---------------------------|---------------------|-------------|
|          |                           | $\Delta E(2)$       |             |
| LP1(O) → | s(Pd)                     | 12.4                |             |
| LP2(O) → | s(Pd)                     | 4.3                 |             |
|          |                           |                     | <b>NLMO</b> |
| LP3(O) → | s(Pd)                     | 13.2                | 5.3% Pd     |
| LP3(O) → | $\sigma^*_{\text{Pd-C2}}$ | 14.0                | 77.0% O     |
| LP3(O) → | $\pi^*_{\text{C2-C3}}$    | 1.6                 | 8.6% C1     |
|          |                           |                     | 2.6% C2     |
|          |                           |                     | 0.4% C3     |

**Plot of NLMO associated to LP3(O)**

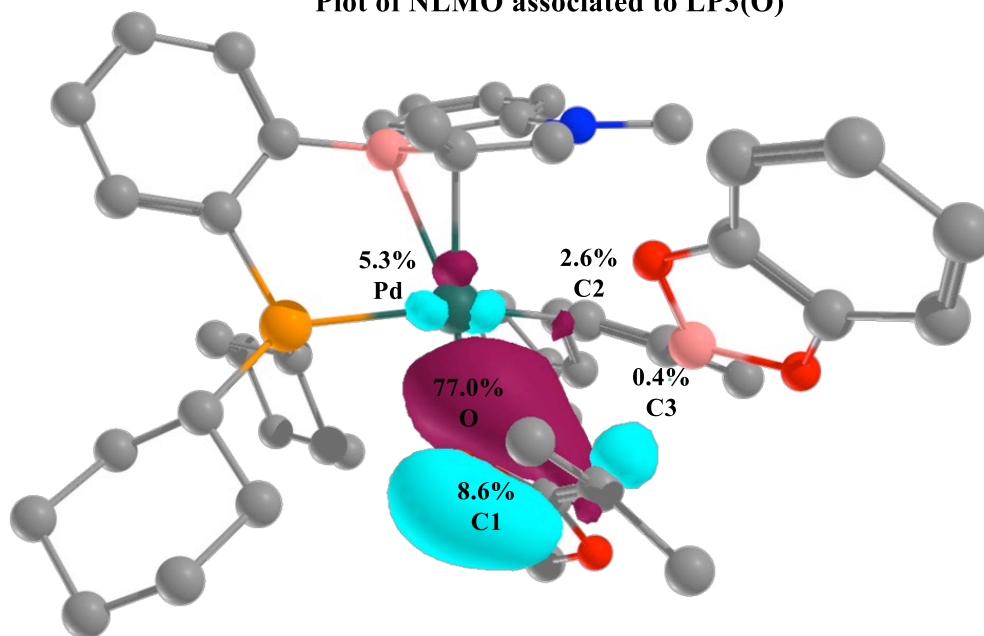

## Activation Strain Model for assessing the bonding of the Pd-enyne complex

In order to understand the origin of the preferred  $\pi$ -alkene coordination *versus*  $\pi$ -alkyne coordination of the Pd-enyne complex, Activation Strain Model (ASM) calculations were carried out for the  $\pi$ -Alkene and the  $\pi$ -Alkyne Pd(0) complexes at SMD(Toluene)-TPSS D3(BJ)/SDD+f(Pd), 6-31G\*\*(other atoms) level of theory. The Activation Strain Model (ASM) of reactivity,<sup>9</sup> also known as distortion/interaction model,<sup>10</sup> is a computational methodology to decompose the potential energy surface,  $\Delta E(\zeta)$ , along the entire reaction coordinate,  $\zeta$ , into the strain,  $\Delta E_{\text{strain}}(\zeta)$ , which is associated with the deformation of the reactants along the reaction and the interaction energy term,  $\Delta E_{\text{int}}(\zeta)$ , between the deformed reactants.

$$\Delta E(\zeta) = \Delta E_{\text{strain}}(\zeta) + \Delta E_{\text{int}}(\zeta)$$

The structures were divided into two fragments, Pd-catalyst and enyne. Single point energy calculations were performed for each fragment in the same geometry as the original optimized  $\pi$ -Alkene and  $\pi$ -Alkyne Pd(0) complexes. The distortion energy ( $\Delta E_{\text{dist}}$ ) is the energy difference between the distorted structure and optimized ground-state structure for each fragment. The interaction energy ( $\Delta E_{\text{int}}$ ) was calculated as the energy difference between  $\Delta E$  (total) (energy difference between the optimized ground-state structures of  $\pi$ -Alkene and  $\pi$ -Alkyne Pd(0) complexes and their corresponding fragments) and the total distortion energy ( $\Delta E_{\text{strain}} = \Delta E_{\text{dist-Pd-catalyst}} + \Delta E_{\text{dist-enyne}}$ ).

DFT calculations show that the alkene-coordination of the 1,3-enyne to Pd is preferred over alkyne-coordination by 9.1 kcal/mol.

The HOMO of the enyne is delocalized all around the  $\pi$ -system, involving C=C double bond, C $\equiv$ C triple bond and phenyl ring, meaning that Pd center can interact either with double or triple bond of the enyne to form corresponding  $\pi$ -complexes. Analysis of the geometrical features of the two  $\pi$ -Pd-enyne complexes suggest that the coordination of Pd to the alkyne (Pd-C: 2.094, 2.107 Å) is stronger than to the alkene (Pd-C: 2.183, 2.202 Å) (See Figure S4). This is corroborated by the difference in the interaction energy ( $\Delta \Delta E_{\text{int}}$ : 5.6 kcal/mol), which is in favor of the triple bond coordination, as revealed by the Activation Strain Model (ASM) approach ( $\Delta E = \Delta E_{\text{strain}} + \Delta E_{\text{int}}$ ) used for the two Pd(0) complexes (See Table S4). However, this stabilizing interaction is counterbalanced by the significant deformation energy of the enyne in the case of the alkyne-coordination, as attested by the deviation of the CCC bond angle (C $_{\alpha}$ C $_{\beta}$ C $_{\gamma}$ : 178.1° in substrate compared to C $_{\alpha}$ C $_{\beta}$ C $_{\gamma}$ : 152.3° and C $_{\text{Me}}$ C $_{\alpha}$ C $_{\beta}$ : 145.6 in  $\pi$ -alkyne complex) and by the calculated deformation energy ( $\Delta E_{\text{strain}}$ : 22.5 kcal/mol in  $\pi$ -alkyne complex *versus*  $\Delta E_{\text{strain}}$ : 9.1 kcal/mol in  $\pi$ -alkene) as shown by ASM results (See Table S4). We conclude that the weaker deformation energy of the enyne moiety upon coordination the double bond to the Pd center ( $\Delta \Delta E_{\text{strain}}$ : 15.2 kcal/mol) is responsible for the preferred Pd(0)-alkene coordination.

**Figure S4.** Optimized structures of enyne and  $\pi$ -Alkene/Alkyne Pd(0) complexes. Main distances and bond angles in Å and degrees, respectively. Relative stability ( $\Delta G$ ) in kcal/mol.

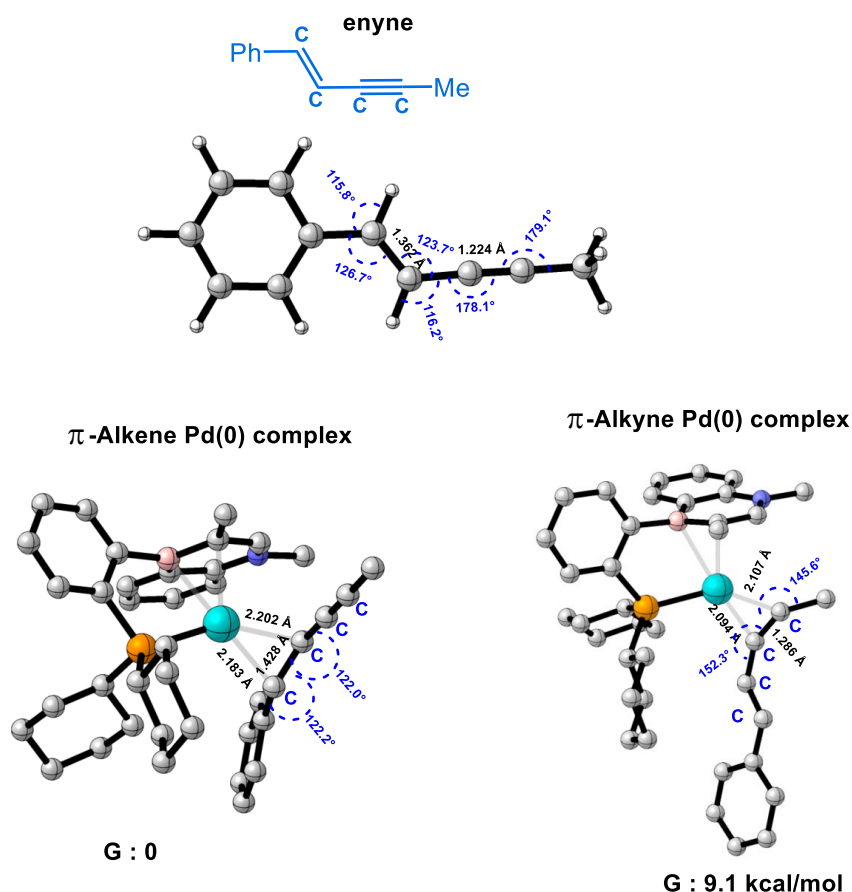

**Table S4.** Activation Strain Model (ASM) energies ( $\Delta E_{\text{strain}}$ ,  $\Delta E_{\text{int}}$  in kcal/mol) for the  $\pi$ -Alkene and  $\pi$ -Alkyne Pd(0) complexes. Energy level: SMD(Toluene)-TPSS D3(BJ)/SDD+f(Pd), 6-31G\*\*(other atoms).

|                                                          | $\pi$ -Alkene Pd(0) complex                            | $\pi$ -Alkyne Pd(0) complex                           |
|----------------------------------------------------------|--------------------------------------------------------|-------------------------------------------------------|
| <b>d(Pd...C) / Å</b>                                     | Pd...C $\gamma$ : 2.205 Å<br>Pd...C $\delta$ : 2.183 Å | Pd...C $\alpha$ : 2.107 Å<br>Pd...C $\beta$ : 2.095 Å |
| <b><math>\Delta E</math> (total)</b>                     | -35.7                                                  | -26.0                                                 |
| <b><math>\Delta E_{\text{Strain-enyne}}</math></b>       | 9.1                                                    | 22.5                                                  |
| <b><math>\Delta E_{\text{Strain-Pd catalyst}}</math></b> | 11.2                                                   | 13.0                                                  |
| <b><math>\Delta E_{\text{Strain (total)}}</math></b>     | 20.3                                                   | 35.4                                                  |
| <b><math>\Delta E_{\text{int}}</math></b>                | -55.9                                                  | -61.5                                                 |

## 8. NMR Spectra

| Parameter                | Value          |
|--------------------------|----------------|
| 1 Origin                 | Varian         |
| 2 Instrument             | vnmrs          |
| 3 Solvent                | cdcl3          |
| 4 Temperature            | 25.0           |
| 5 Number of Scans        | 8              |
| 6 Receiver Gain          | 28             |
| 7 Relaxation Delay       | 10.0000        |
| 8 Spectrometer Frequency | 599.68         |
| 9 Nucleus                | <sup>1</sup> H |

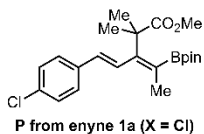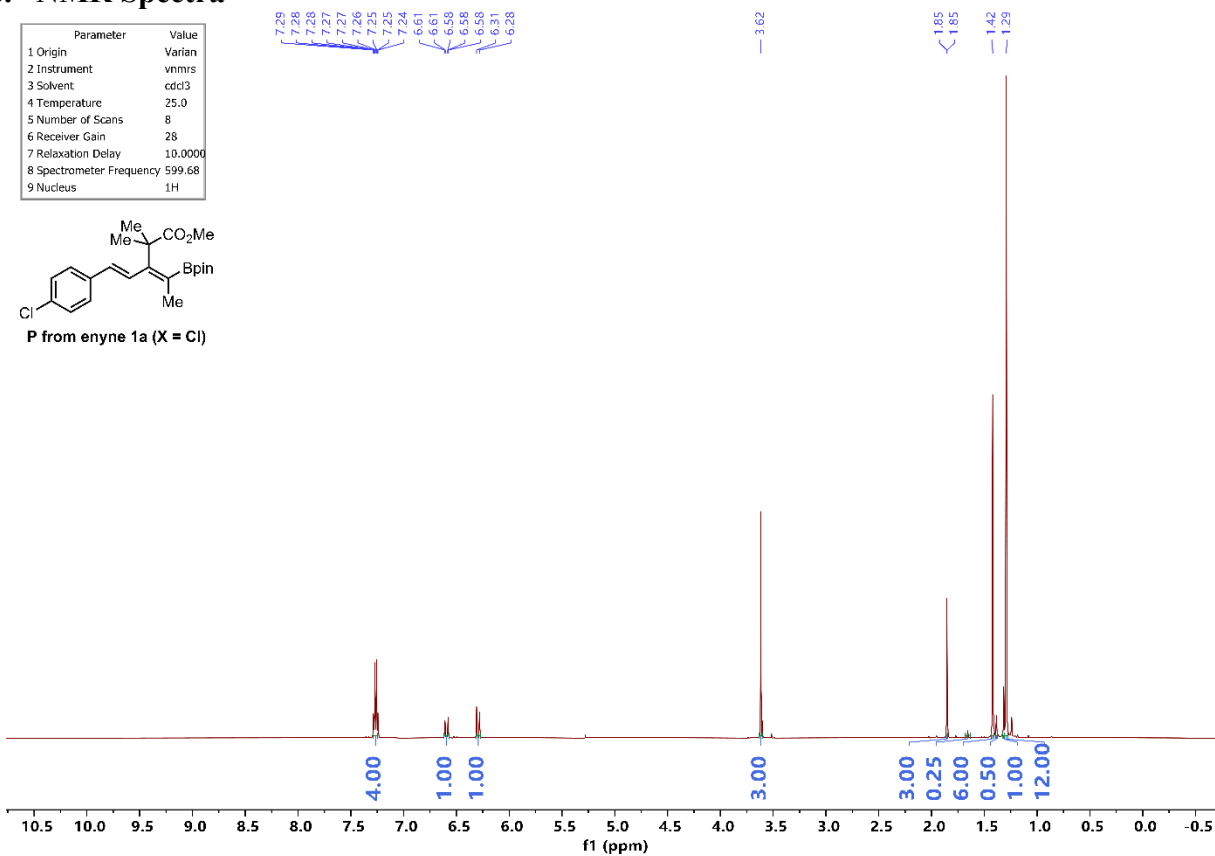

| Parameter                | Value           |
|--------------------------|-----------------|
| 1 Origin                 | Varian          |
| 2 Instrument             | vnmrs           |
| 3 Solvent                | cdcl3           |
| 4 Temperature            | 25.0            |
| 5 Number of Scans        | 43              |
| 6 Receiver Gain          | 30              |
| 7 Relaxation Delay       | 1.0000          |
| 8 Spectrometer Frequency | 150.81          |
| 9 Nucleus                | <sup>13</sup> C |

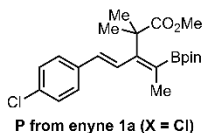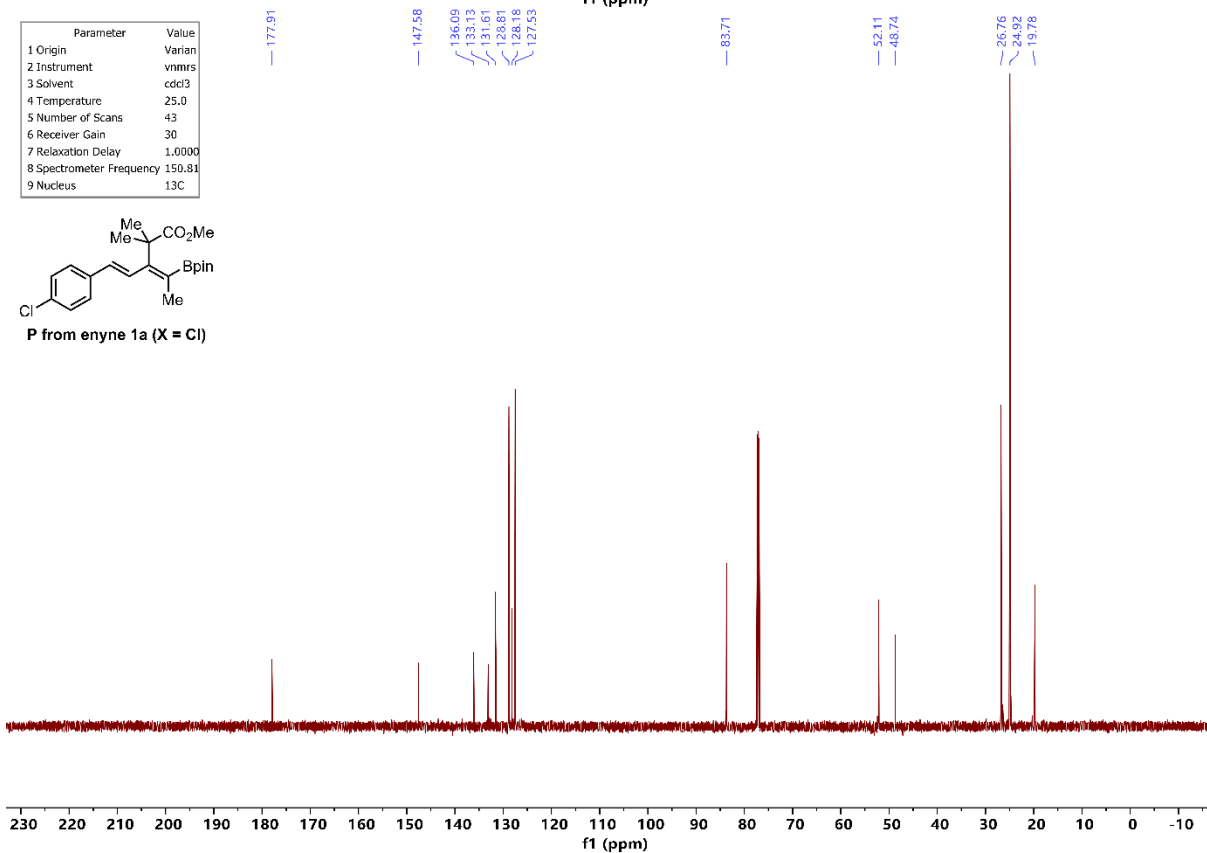

| Parameter                | Value  |
|--------------------------|--------|
| 1 Origin                 | Varian |
| 2 Instrument             | vnmr5  |
| 3 Solvent                | cdcl3  |
| 4 Temperature            | 25.0   |
| 5 Number of Scans        | 400    |
| 6 Receiver Gain          | 30     |
| 7 Relaxation Delay       | 0.0100 |
| 8 Spectrometer Frequency | 160.38 |
| 9 Nucleus                | 11B    |

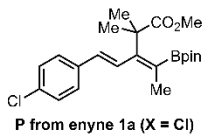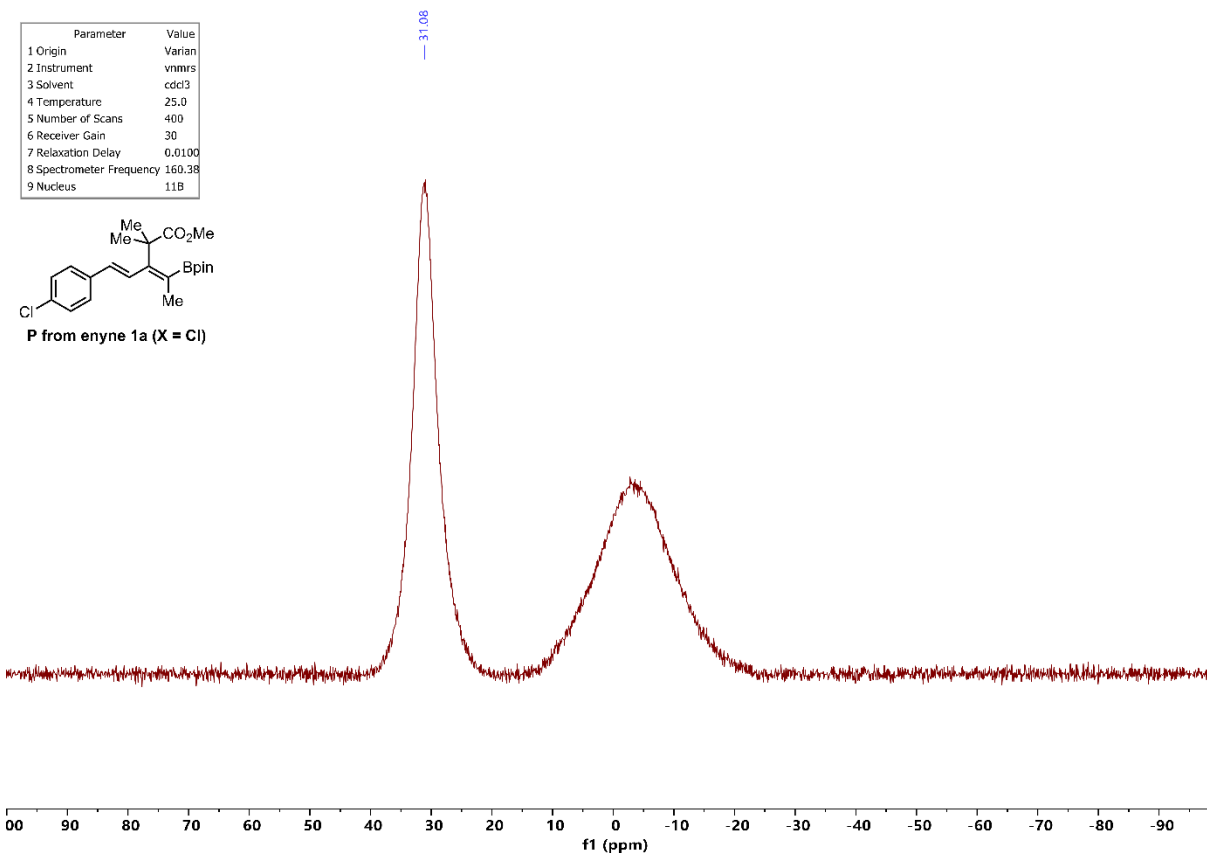

| Parameter                | Value   |
|--------------------------|---------|
| 1 Origin                 | Varian  |
| 2 Instrument             | vnmr5   |
| 3 Solvent                | cdcl3   |
| 4 Temperature            | 25.0    |
| 5 Number of Scans        | 6       |
| 6 Receiver Gain          | 0       |
| 7 Relaxation Delay       | 10.0000 |
| 8 Spectrometer Frequency | 599.68  |
| 9 Nucleus                | 1H      |

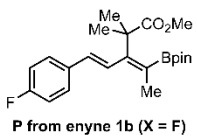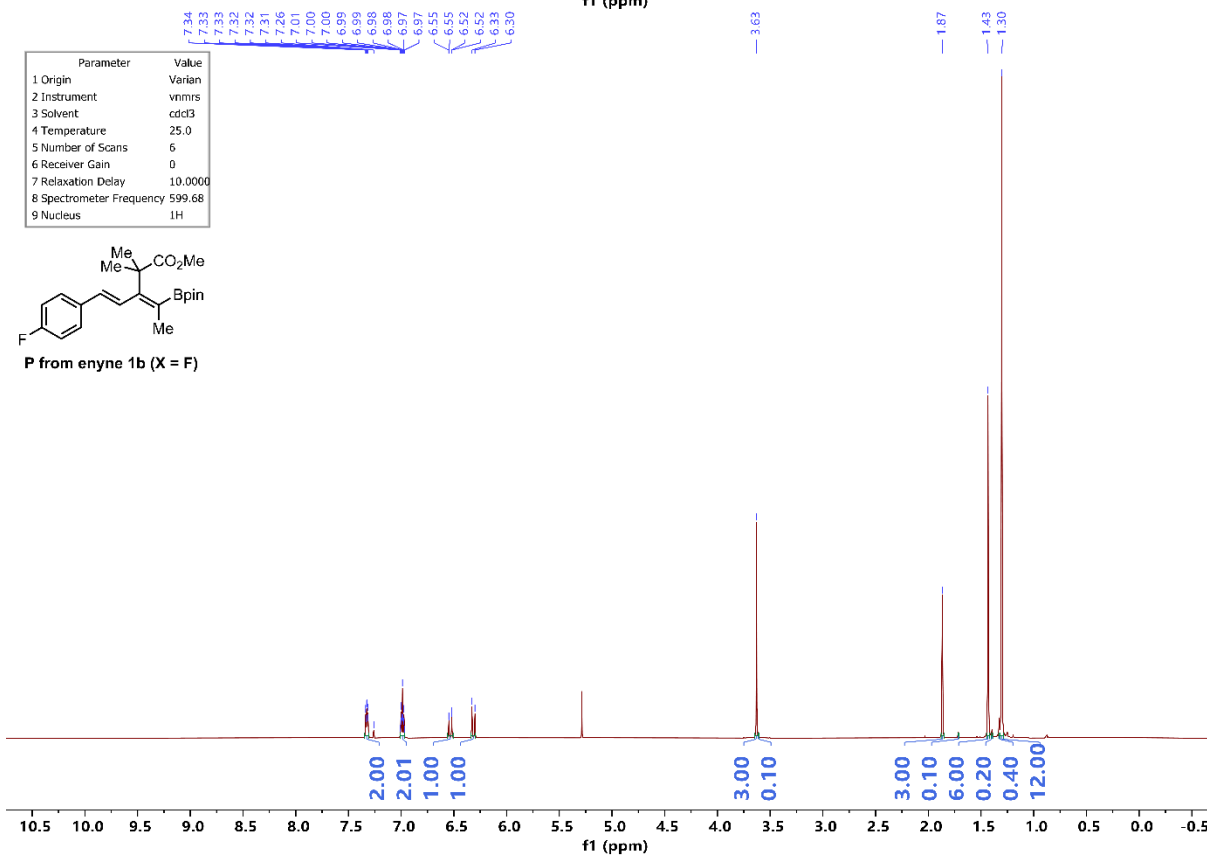

| Parameter                | Value  |
|--------------------------|--------|
| 1 Origin                 | Varian |
| 2 Instrument             | vnmrs  |
| 3 Solvent                | cdcl3  |
| 4 Temperature            | 25.0   |
| 5 Number of Scans        | 200    |
| 6 Receiver Gain          | 30     |
| 7 Relaxation Delay       | 1.0000 |
| 8 Spectrometer Frequency | 150.81 |
| 9 Nucleus                | 13C    |

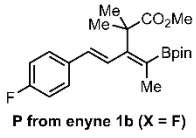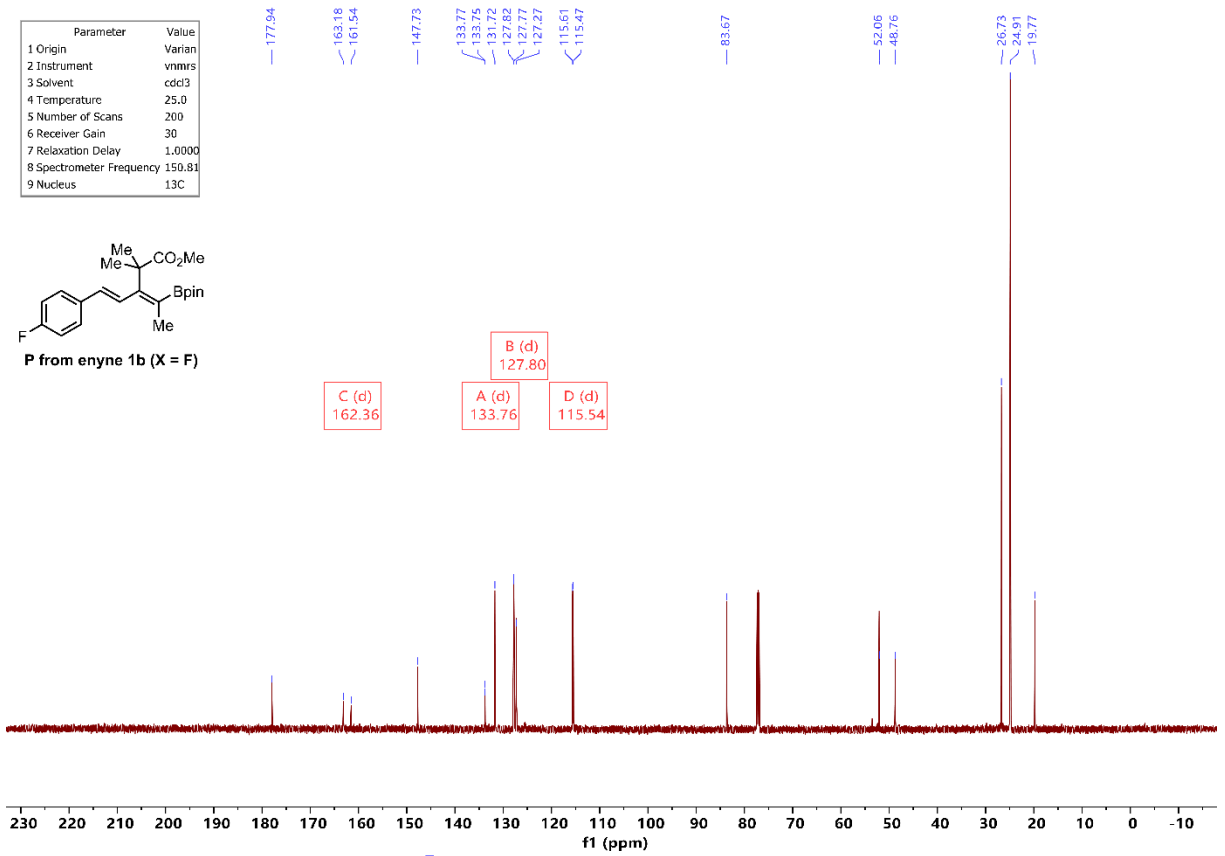

| Parameter                | Value  |
|--------------------------|--------|
| 1 Origin                 | Varian |
| 2 Instrument             | vnmrs  |
| 3 Solvent                | cdcl3  |
| 4 Temperature            | 25.0   |
| 5 Number of Scans        | 600    |
| 6 Receiver Gain          | 30     |
| 7 Relaxation Delay       | 0.0100 |
| 8 Spectrometer Frequency | 192.40 |
| 9 Nucleus                | 11B    |

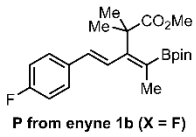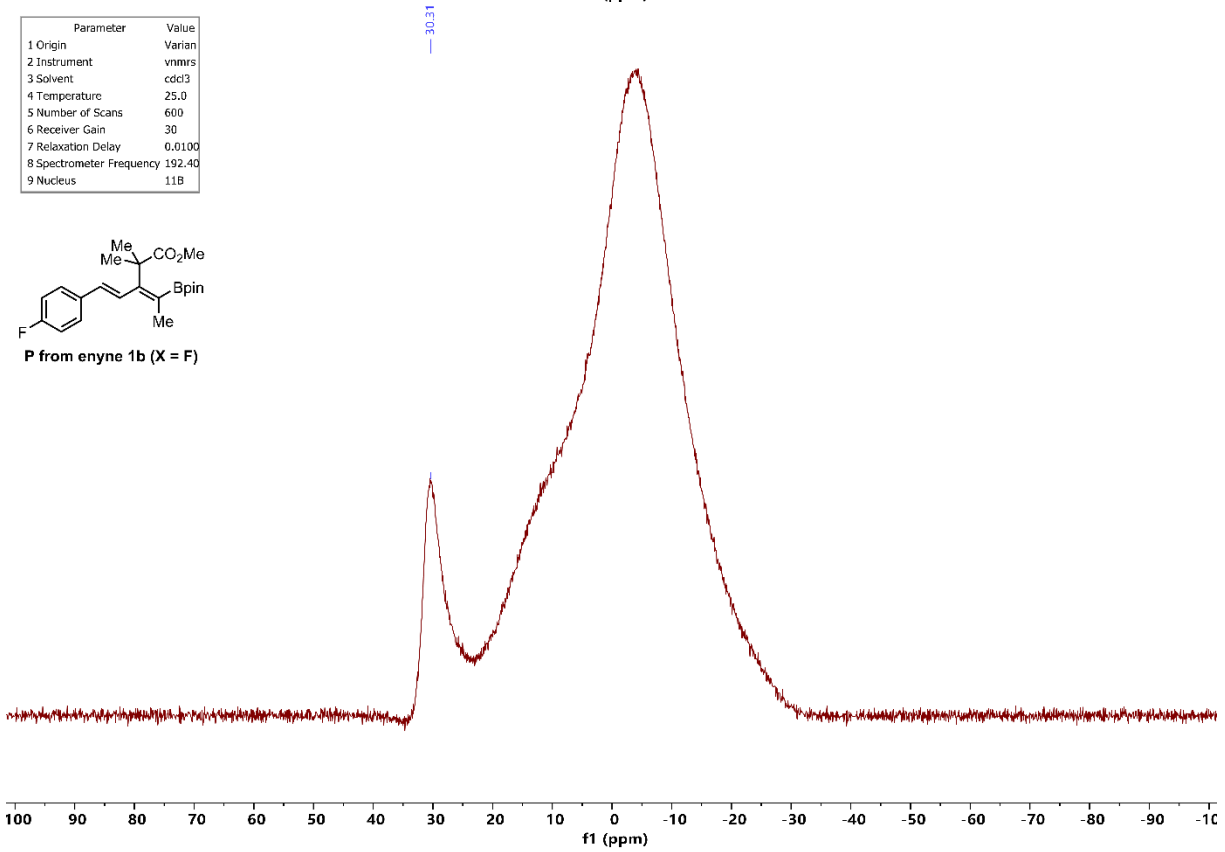

| Parameter                | Value  |
|--------------------------|--------|
| 1 Origin                 | Varian |
| 2 Instrument             | vnmrs  |
| 3 Solvent                | cdcl3  |
| 4 Temperature            | 25.0   |
| 5 Number of Scans        | 16     |
| 6 Receiver Gain          | 46     |
| 7 Relaxation Delay       | 1.0000 |
| 8 Spectrometer Frequency | 564.22 |
| 9 Nucleus                | 19F    |

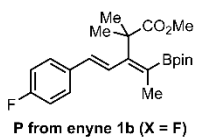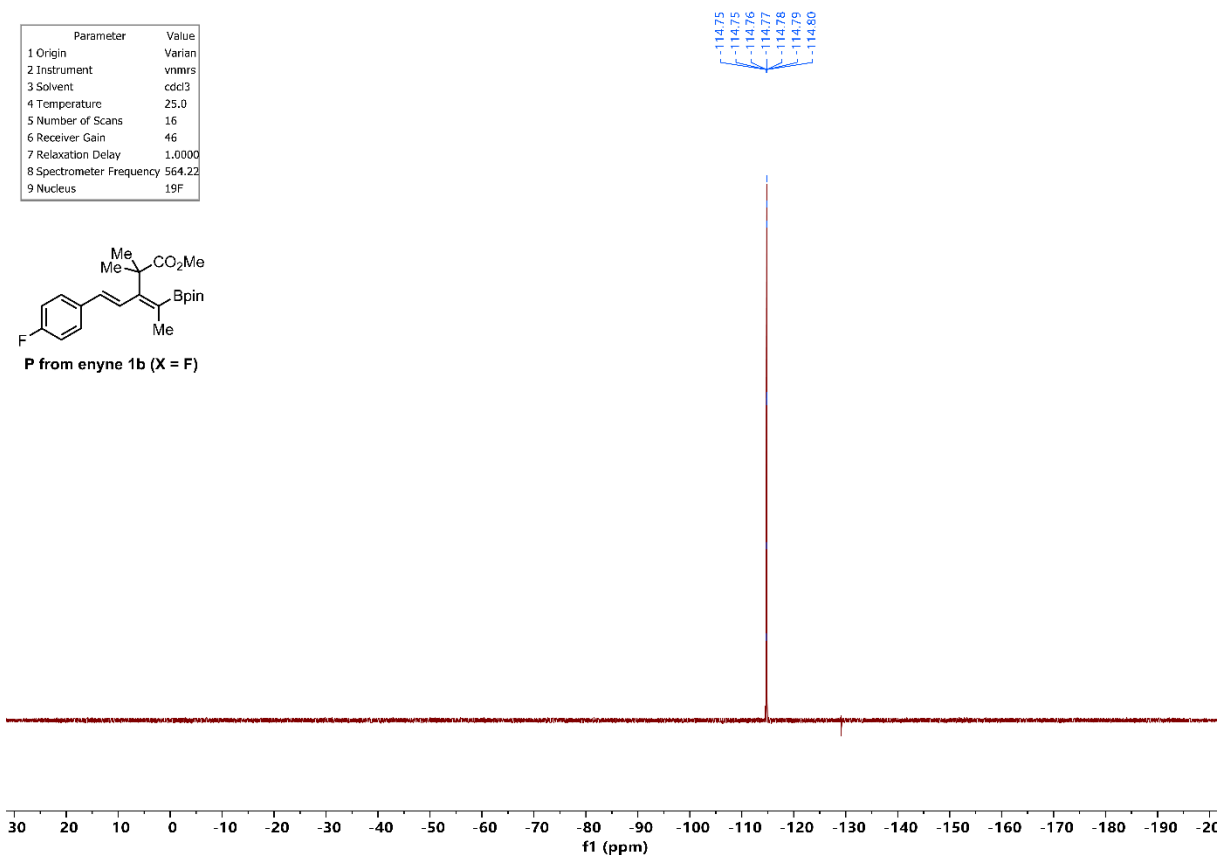

| Parameter                | Value   |
|--------------------------|---------|
| 1 Origin                 | Varian  |
| 2 Instrument             | vnmrs   |
| 3 Solvent                | cdcl3   |
| 4 Temperature            | 25.0    |
| 5 Number of Scans        | 8       |
| 6 Receiver Gain          | 26      |
| 7 Relaxation Delay       | 10.0000 |
| 8 Spectrometer Frequency | 499.88  |
| 9 Nucleus                | 1H      |

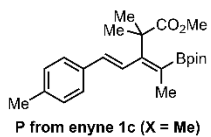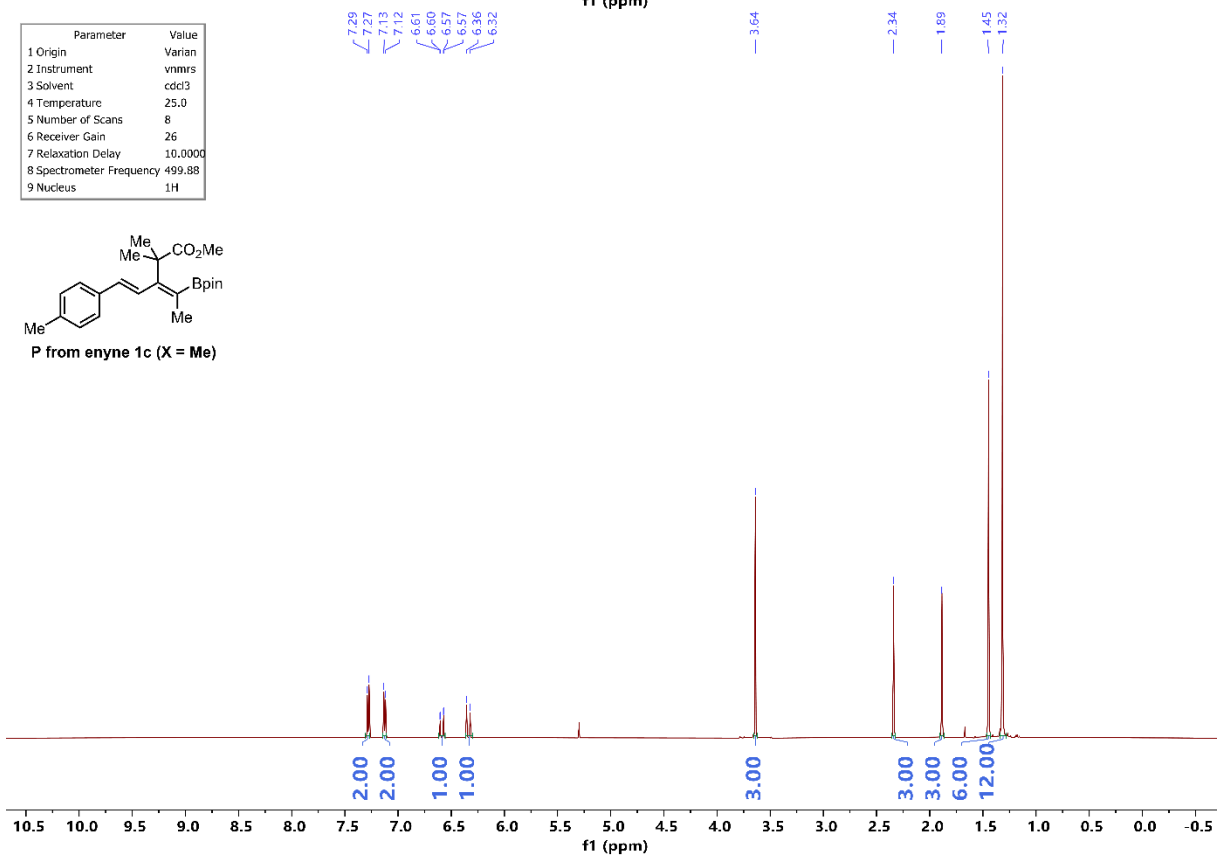



| Parameter                | Value  |
|--------------------------|--------|
| 1 Origin                 | Varian |
| 2 Instrument             | vnmrs  |
| 3 Solvent                | cdcl3  |
| 4 Temperature            | 25.0   |
| 5 Number of Scans        | 380    |
| 6 Receiver Gain          | 30     |
| 7 Relaxation Delay       | 1.0000 |
| 8 Spectrometer Frequency | 125.71 |
| 9 Nucleus                | 13C    |

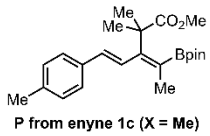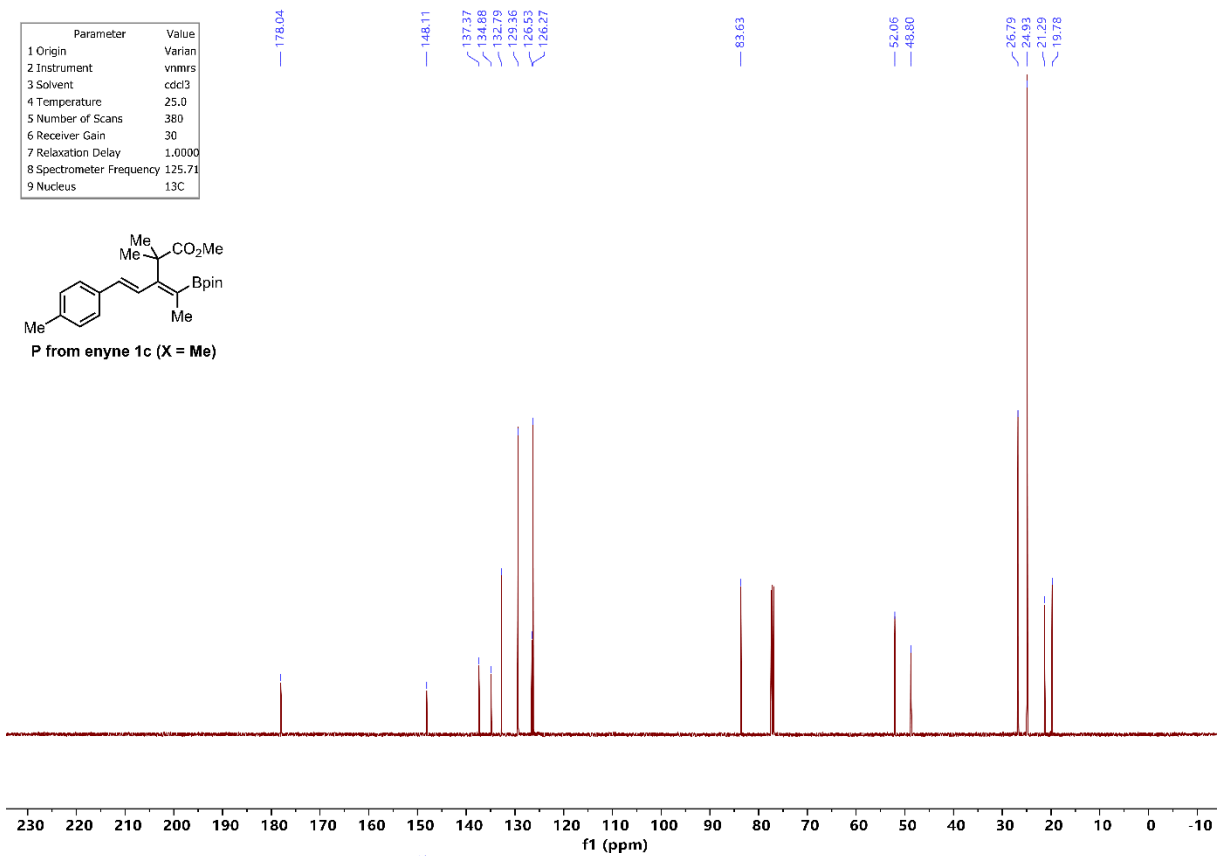

| Parameter                | Value  |
|--------------------------|--------|
| 1 Origin                 | Varian |
| 2 Instrument             | vnmrs  |
| 3 Solvent                | cdcl3  |
| 4 Temperature            | 25.0   |
| 5 Number of Scans        | 400    |
| 6 Receiver Gain          | 30     |
| 7 Relaxation Delay       | 0.0100 |
| 8 Spectrometer Frequency | 160.38 |
| 9 Nucleus                | 11B    |

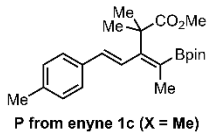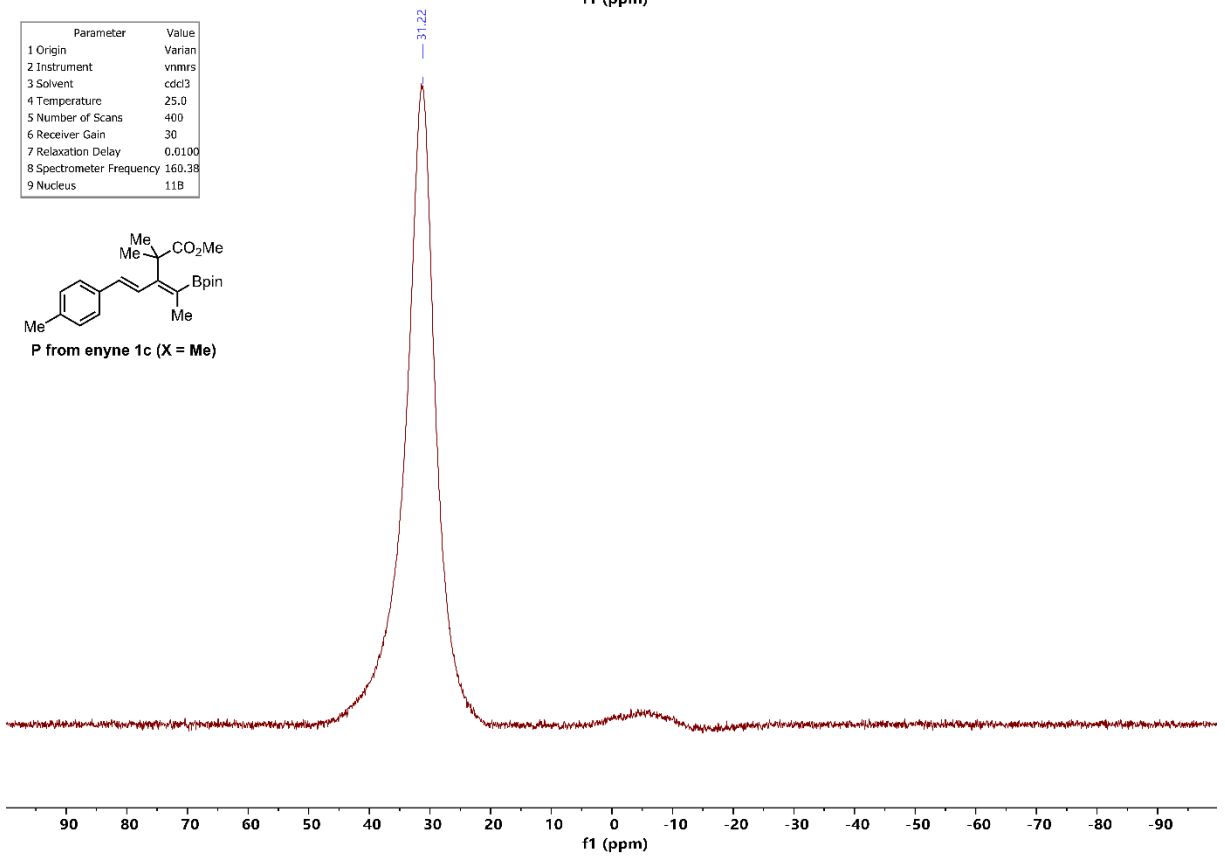

| Parameter                | Value   |
|--------------------------|---------|
| 1 Origin                 | Varian  |
| 2 Instrument             | vnmrs   |
| 3 Solvent                | cdcl3   |
| 4 Temperature            | 25.0    |
| 5 Number of Scans        | 8       |
| 6 Receiver Gain          | 22      |
| 7 Relaxation Delay       | 10.0000 |
| 8 Spectrometer Frequency | 499.88  |
| 9 Nucleus                | 1H      |

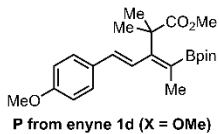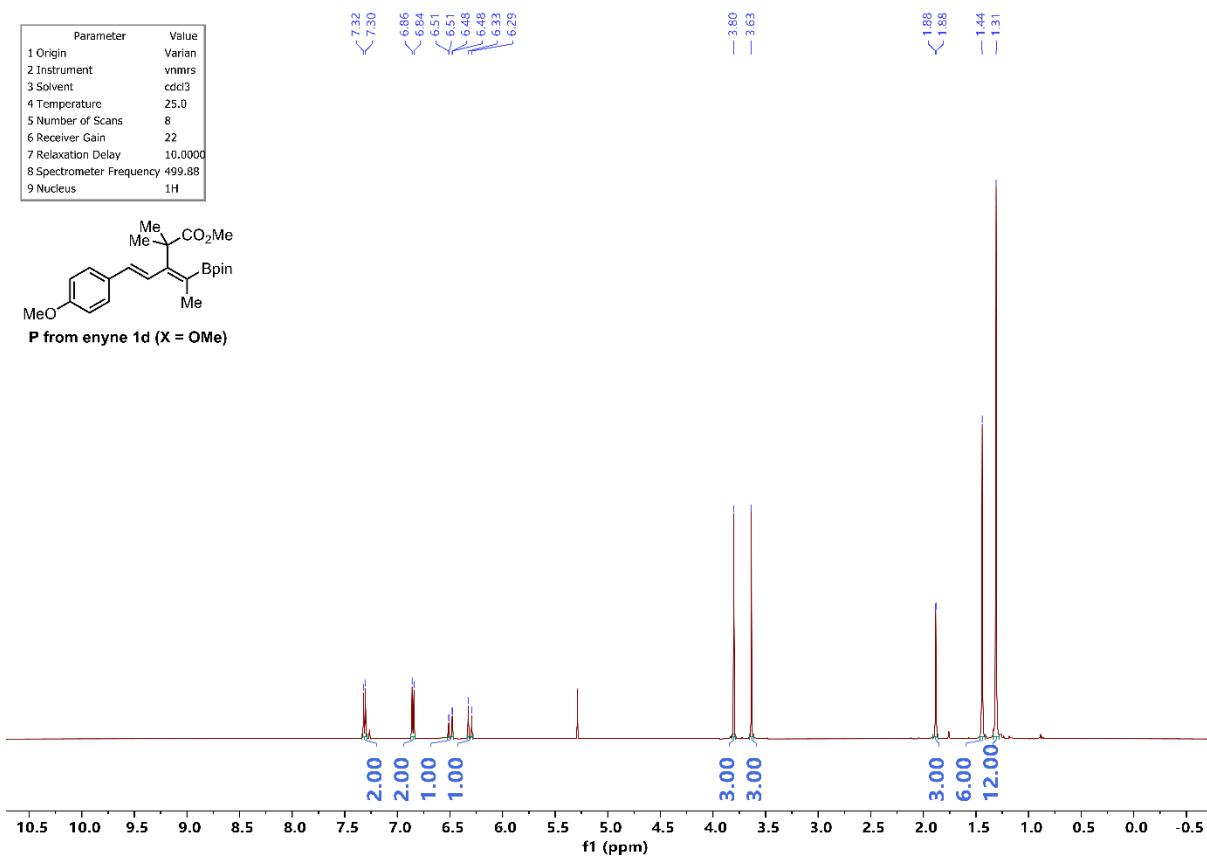

| Parameter                | Value  |
|--------------------------|--------|
| 1 Origin                 | Varian |
| 2 Instrument             | vnmrs  |
| 3 Solvent                | cdcl3  |
| 4 Temperature            | 25.0   |
| 5 Number of Scans        | 200    |
| 6 Receiver Gain          | 30     |
| 7 Relaxation Delay       | 1.0000 |
| 8 Spectrometer Frequency | 125.71 |
| 9 Nucleus                | 13C    |

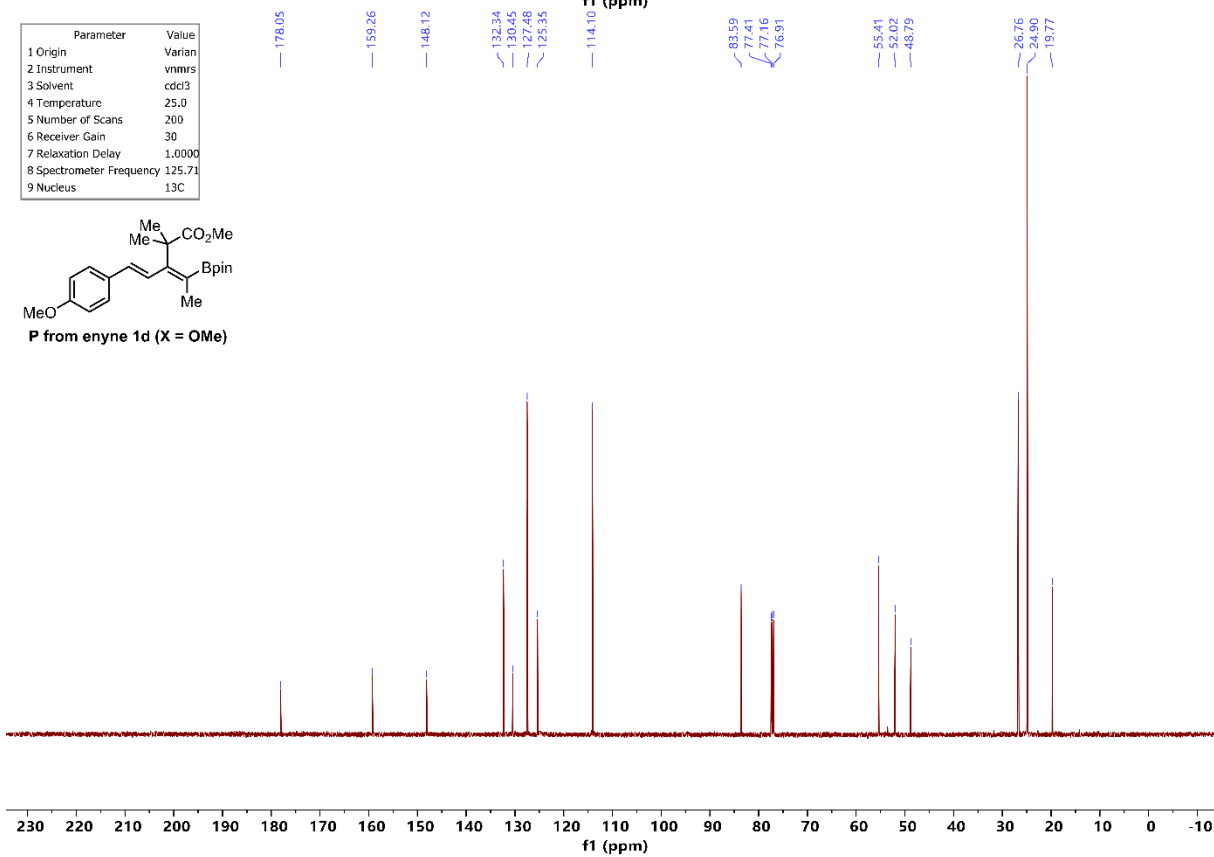

| Parameter                | Value  |
|--------------------------|--------|
| 1 Origin                 | Varian |
| 2 Instrument             | nmr5   |
| 3 Solvent                | cdcl3  |
| 4 Temperature            | 25.0   |
| 5 Number of Scans        | 600    |
| 6 Receiver Gain          | 30     |
| 7 Relaxation Delay       | 0.0100 |
| 8 Spectrometer Frequency | 160.38 |
| 9 Nucleus                | 11B    |

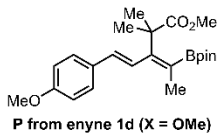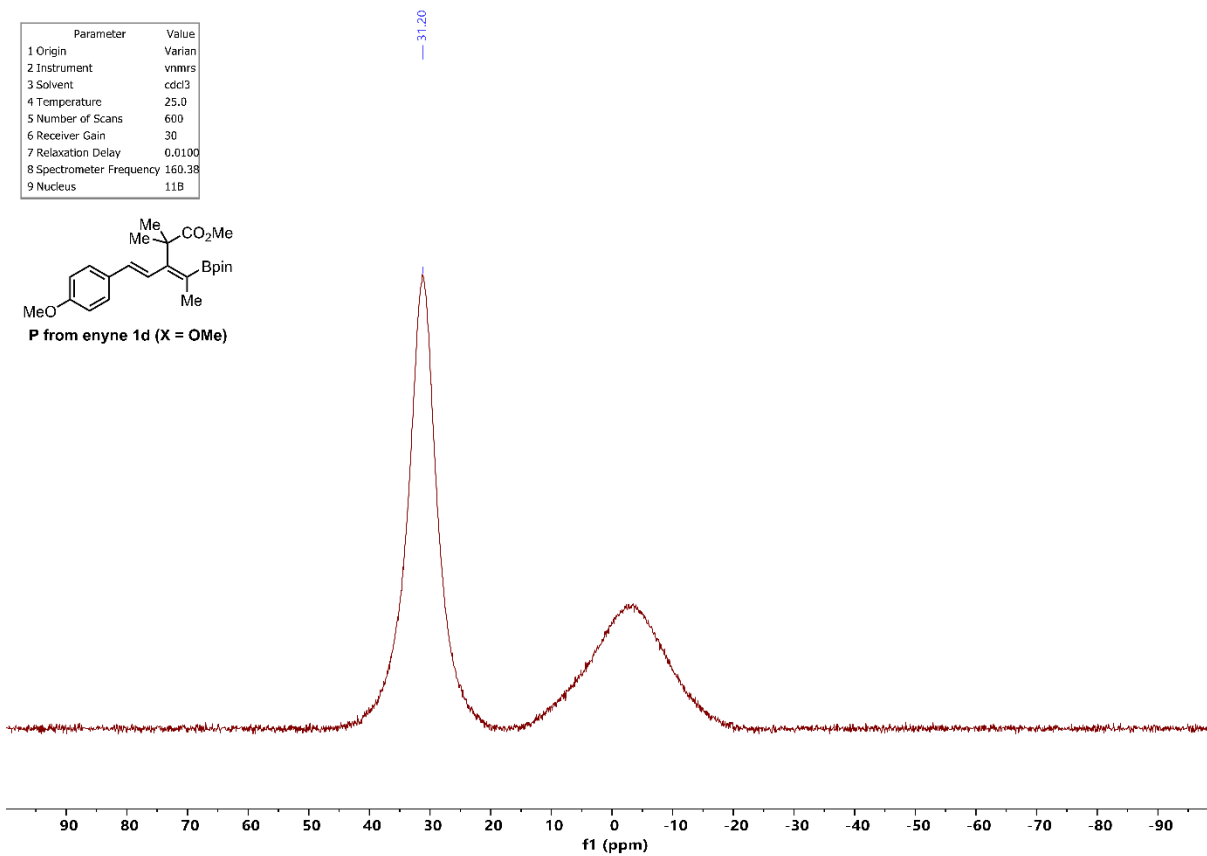

## 9. References

---

- 1) C. Hansch, A. Leo and R. W. Taft, *Chem. Rev.*, 1991, **91**, 165-195.
- 2) Gaussian 09, Revision **D.01**, M. J. Frisch, G. W. Trucks, H. B. Schlegel, G. E. Scuseria, M. A. Robb, J. R. Cheeseman, G. Scalmani, V. Barone, B. Mennucci, G. A. Petersson, H. Nakatsuji, M. Caricato, X. Li, H. P. Hratchian, A. F. Izmaylov, J. Bloino, G. Zheng, J. L. Sonnenberg, M. Hada, M. Ehara, K. Toyota, R. Fukuda, J. Hasegawa, M. Ishida, T. Nakajima, Y. Honda, O. Kitao, H. Nakai, T. Vreven, J. A. Montgomery Jr., J. E. Peralta, F. Ogliaro, M. Bearpark, J. J. Heyd, E. Brothers, K. N. Kudin, V. N. Staroverov, R. Kobayashi, J. Normand, K. Raghavachari, A. Rendell, J. C. Burant, S. S. Iyengar, J. Tomasi, M. Cossi, N. Rega, J. M. Millam, M. Klene, J. E. Knox, J. B. Cross, V. Bakken, C. Adamo, J. Jaramillo, R. Gomperts, R. E. Stratmann, O. Yazyev, A. J. Austin, R. Cammi, C. Pomelli, J. W. Ochterski, R. L. Martin, K. Morokuma, V. G. Zakrzewski, G. A. Voth, P. Salvador, J. J. Dannenberg, S. Dapprich, A. D. Daniels, Ö. Farkas, J. B. Foresman, J. V. Ortiz, J. Cioslowski, D. J. Fox, Gaussian 09 (Version A.02), Gaussian, Inc., Wallingford CT, **2009**.
- 3) J. Tao, J. P. Perdew, V. N. Staroverov and G. E. Scuseria, *Phys. Rev. Lett.*, 2003, **91**, 146401-146404.
- 4) (a) S. Grimme, J. Antony, S. Ehrlich and H. Krieg, *J. Chem. Phys.*, 2010, **132**, 154104; (b) S. Grimme, S. Ehrlich and L. Goerigk, *J. Comp. Chem.*, 2011, **32**, 1456-1465.
- 5) (a) D. Andrae, U. Häußermann, M. Dolg, H. Stoll and H. Preuß, *Theor. Chim. Acta*, 1990, **77**, 123-141; (b) A. W. Ehlers, M. Böhme, S. Dapprich, A. Gobbi, A. Höllwarth, V. Jonas, K. F. Köhler, R. Stegmann, A. Veldkamp and G. Frenking, *Chem. Phys. Lett.*, 1993, **208**, 111-114.
- 6) A. V. Marenich, C. J. Cramer and D. G. Truhlar, *J. Phys. Chem. B*, 2009, **113**, 6378-6396.
- 7) (a) K. Fukui, *Acc. Chem. Res.*, 1981, **14**, 363-368. (b) H. P. Hratchian, H. B. Schlegel, in *Theory and Applications of Computational Chemistry: The First 40 Years*, C. E. Dykstra, G. Frenking, K. S. Kim, G. Scuseria, Eds., Elsevier, Amsterdam, **2005**, 195.
- 8) (a) A. E. Reed, L. A. Curtiss and F. Weinhold, *Chem. Rev.*, 1988, **88**, 899-926; (b) J. P. Foster and F. Weinhold, *J. Am. Chem. Soc.*, 1980, **102**, 7211-7218; (c) A. E. Reed and F. Weinhold, *J. Chem. Phys.*, 1985, **83**, 1736-1740. (d) NBO 7.0 program, Glendening, E. D.; Badenhoop, J. K.; Reed, A. E.; Carpenter, J. E.; Bohmann, J. A.; Morales, C. M.; Karafiloglou, P.; Landis, C. R.; Weinhold, F. Theoretical Chemistry Institute, University of Wisconsin, Madison (2018).
- 9) For recent reviews, see: (a) I. Fernández, F. M. Bickelhaupt, *Chem. Soc. Rev.*, 2014, **43**, 4953-4967. (b) L. P. Wolters, F. M. Bickelhaupt, *WIREs Comput. Mol. Sci.*, 2015, **5**, 324-343. (c) F. M. Bickelhaupt, K. N. Houk, *Angew. Chem. Int. Ed.* **2017**, *56*, 10070; *Angew. Chem.* **2017**, *129*, 10204. (d) P. Vermeeren, S. C. C. van der Lubbe, C. Fonseca Guerra, F. M. Bickelhaupt, T. A. Hamlin, *Nat. Protoc.*, 2020, **15**, 649-667. (e) I. Fernández, in *Discovering the Future of Molecular Sciences* (Ed.: B. Pignataro), Wiley-VCH, Weinheim, 2014, 165-187.
- 10) (a) D. H. Ess, K. N. Houk, *J. Am. Chem. Soc.*, 2007, **129**, 10646-10647. (b) D. H. Ess, K. N. Houk, *J. Am. Chem. Soc.*, 2008, **130**, 10187-10198.
